# Supplementary material for: Combination of the structural components of amino acids with fatty acids: access to an unknown class of “fatty” α-amino acids by palladium-catalyzed amidocarbonylation
Source: Royal Society of Chemistry journal article supplement (doi:10.1039/d4qo01127a), 2025-01-01

## Supporting Information

### Combination of the structural components of amino acids with fatty acids: Access to an unknown class of “fatty” $\alpha$ -amino acids by palladium-catalyzed amidocarbonylation

Mohammed Asadpour,<sup>[b]</sup> ‡ Edson Leonardo Scarpa de Souza,<sup>[b]</sup> ‡ Anke Spannenberg,<sup>[b]</sup>  
Carlos Roque Duarte Correia,<sup>[c]</sup> Helfried Neumann,<sup>[b]</sup> and Matthias Beller\*<sup>[a]</sup>

---

[a] Prof. Dr. M. Beller  
Leibniz-Institut für Katalyse e.V.  
Albert-Einstein-Str. 29a, 18059 Rostock (Germany)  
E-mail: [matthias.beller@catalysis.de](mailto:matthias.beller@catalysis.de)

[b] MSc M. Asadpour, MSc E. L. S. de Souza, Dr. H. Neumann  
Leibniz-Institut für Katalyse e.V.  
Albert-Einstein-Str. 29a, 18059 Rostock (Germany)

[c] Prof. Dr. C. R. D. Correia  
Department of Organic Chemistry  
Institute of Chemistry, University of Campinas  
Josué de Castro, 10384-612, Campinas, São Paulo, Brazil

‡ These authors contributed equally to the development of this paper.

**Abstract:** Applying the palladium-catalyzed amidocarbonylation a new class of amino acid derivatives, so-called fatty amino acids, are synthesized in one step in 100% atom-efficient manner. Utilizing 0.5 mol% of Pd(OAc)<sub>2</sub> simple diverse new N-acyl fatty amino acids can be synthesized in good to high yields in up to multi-g-scale. The shown products represent a combination of two essential classes of natural products.

## Summary

|                                                            |     |
|------------------------------------------------------------|-----|
| General Remarks .....                                      | S3  |
| General procedure for amidocarbonylation of aldehyde ..... | S4  |
| Screening of the reaction conditions .....                 | S5  |
| Kinetics studies .....                                     | S7  |
| Characterization of the compounds.....                     | S10 |
| X-Ray Diffraction .....                                    | S15 |
| NMR Spectra.....                                           | S16 |

## General Remarks

All commercial reagents were obtained from the following chemical companies: Aldrich, Fisher Scientific, BLDpharm, TCI, ABCR and Strem. Unless otherwise noted, the commercial reagents were used without purification. The reactions with air- and moisture-sensitive reagents were carried out under argon atmosphere using standard Schlenk technique or in a M. Braun glovebox. Anhydrous and oxygen-free solvents (THF, DCM, diethyl ether, toluene, benzene, *n*-pentane, *n*-hexane and *n*-heptane) were received from an Innovative Technology PS-MD-6 solvent purification system or they were prepared by freeze-pump-thaw technique. All anhydrous solvent were stored over 3 Å molecular sieves under argon atmosphere.

Analytical thin-layer chromatography (TLC) was performed on Machery-Nagel pre-coated ALUGRAM Xtra SIL G/UV254 TLC sheets. Visualization was achieved by irradiation with UV-light, or by staining with potassium permanganate, *p*-anisaldehyde or phosphomolybdic acid solution. Flash Column chromatography was performed with a Combi Flash Rf + from Teledyne ISCO using HPLC grade solvents.

NMR spectra were recorded on Bruker Avance 300 (300 MHz) or 400 (400 MHz) NMR spectrometers. The chemical shifts ( $\delta$ ) are reported in parts per million (ppm) and coupling constants (J) in hertz (Hz). All chemical shifts ( $\delta$ ) are given relative to solvent: references for CDCl<sub>3</sub> 7.26 ppm (<sup>1</sup>H) and 77.16 ppm (<sup>13</sup>C). MeOD refers to CD<sub>3</sub>OD. Multiplets of NMR were assigned as s (singlet), br s (broad singlet) d (doublet), t (triplet), q (quartet), ps-qui (pseudo-quintet), ps-h (pseudo-hextet), hept (heptet), ps-n (pseudo-nonet), dd (doublet of doublet), dt (doublet of triplet), dq (doublet of quartet), dh (doublet of heptet), ddd (doublet of doublet of doublet), td (triplet of doublet), and m (multiplet). All NMR measurements were carried out at room temperature.

GC measurements were performed on an Agilent HP 6890 with a HP5 column. GC-MS spectra were recorded on a GC-MS Agilent 5973 Network. HRMS measurements were performed using a Waters Xevo G2XS TOF MS. ATR-IR spectra were recorded on a Nicolet iS5 FT-IR equipped with a PIKE Technologies GladiATR (Thermo Fisher).

Data were collected on a Bruker Kappa APEX II Duo diffractometer. The structure was solved by intrinsic phasing (SHELXT: Sheldrick, G. M. *Acta Cryst.* **2015**, *A71*, 3.) and refined by full-matrix least-squares procedures on  $F^2$  (SHELXL-2019: Sheldrick, G. M. *Acta Cryst.* **2015**, *C71*, 3.). XP (Bruker AXS) was used for graphical representation. CCDC 2332462 contains the supplementary crystallographic data for this paper. These data are provided free of charge by the joint Cambridge Crystallographic Data Centre and Fachinformationszentrum Karlsruhe Access Structures service [www.ccdc.cam.ac.uk/structures](http://www.ccdc.cam.ac.uk/structures).

### General procedure for amidocarbonylation of aldehyde

A 8 mL vial equipped with a stir bar was charged with Pd(OAc)<sub>2</sub> (0.5 mol%), aldehyde (0.5 mmol, 1 equiv), amide (0.5 mmol, 1 equiv), LiBr (35 mol%) and H<sub>2</sub>SO<sub>4</sub> (1 mol%) in NMP (1 mL). The reaction mixture was stirred under 60 bar CO at 100°C for 16 h. After this time, the crude was filtered through a small pad of Celite® with EtOAc and it was concentrated under reduced pressure. Then, NMP was removed from the crude with distillation (1 mbar, 68°C) and proceeded to one of the following extraction methods or column chromatography.

**Extraction method A:** After distillation of NMP, the crude was dissolved in EtOAc (50 mL) and washed with saturated aqueous NaHCO<sub>3</sub> solution (3 x 30 mL), resulting in organic phase A and aqueous phase A. The combined aqueous phase A were acidified with HCl until pH 2, and then, extracted with EtOAc (3 x 30 mL), resulting in organic phase B and aqueous phase B. Both organic phases (A and B) were combined and dried over Na<sub>2</sub>SO<sub>4</sub> and concentrated under reduced pressure. The residue was washed with n-pentane and the desired product was precipitated as a white solid.

**Extraction method B:** After distillation of NMP, the crude was dissolved in EtOAc (50 mL) and washed with aqueous solution of NaOH 1,0 mol/L (1 x 50 mL). Aqueous phase was acidified with HCl until pH 2, and then, extracted with EtOAc (3 x 30 mL). Organic phases were combined and dried over Na<sub>2</sub>SO<sub>4</sub> and concentrated under reduced pressure. The residue was washed with n-pentane and the desired product was precipitated as a white solid.

## Screening of the reaction conditions

**Table 1.** Evaluation of palladium sources

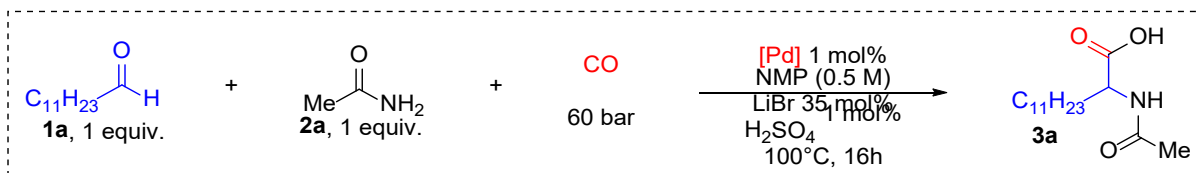

| Entry    | [Pd]                               | Yield (%)           |
|----------|------------------------------------|---------------------|
| <b>1</b> | <b>Pd(OAc)<sub>2</sub></b>         | <b>Quantitative</b> |
| <b>2</b> | PdBr <sub>2</sub>                  | 74                  |
| <b>3</b> | Pd/C                               | 65                  |
| <b>4</b> | Pd(acac) <sub>2</sub>              | Quantitative        |
| <b>5</b> | Pd <sub>2</sub> (dba) <sub>3</sub> | 61                  |

**Table 2.** Evaluation of solvents

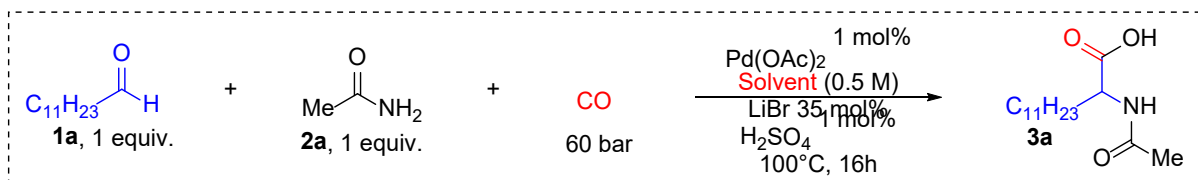

| Entry    | Solvent       | Yield (%) |
|----------|---------------|-----------|
| <b>1</b> | <b>NMP</b>    | <b>98</b> |
| <b>2</b> | DMA           | 78        |
| <b>3</b> | MeCN          | Traces    |
| <b>4</b> | DMF           | Traces    |
| <b>5</b> | Ethyl acetate | 34        |

**Table 3.** Evaluation of CO pressure

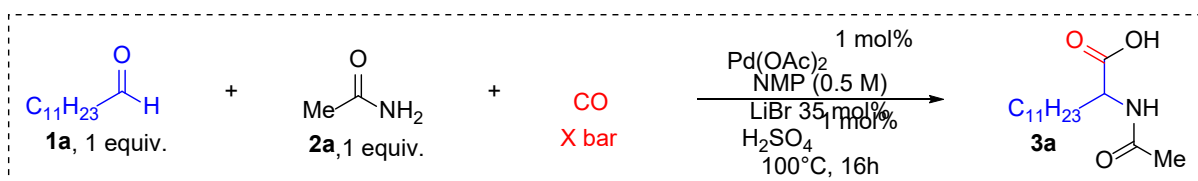

| Entry    | CO pressure   | Yield (%) |
|----------|---------------|-----------|
| <b>1</b> | <b>60 bar</b> | <b>98</b> |
| <b>2</b> | 40 bar        | 95        |
| <b>3</b> | 20 bar        | 91        |

**Table 4.** Evaluation of temperature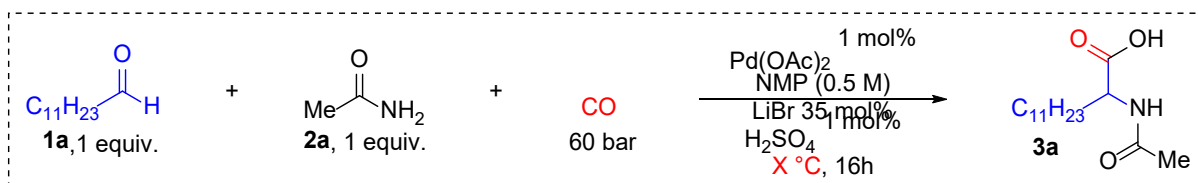

| Entry | Temperature | Yield (%) |
|-------|-------------|-----------|
| 1     | 100 °C      | 98        |
| 2     | 80 °C       | 89        |
| 3     | 60 °C       | 73        |

**Table 5.** Evaluation of reaction time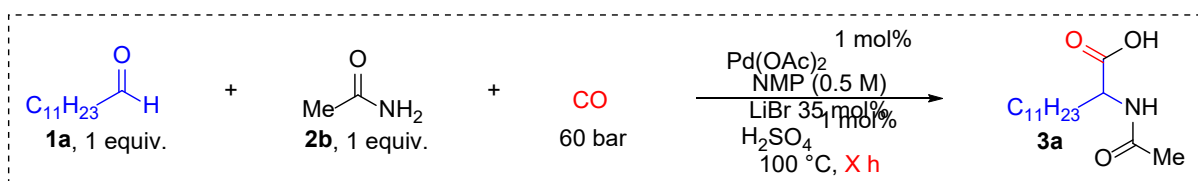

| Entry | Time (h)       | Yield (%) |
|-------|----------------|-----------|
| 1     | 16 (16h to 8h) | 98        |
| 2     | 12 (20h to 8h) | 73        |

**Table 6.** Evaluation of palladium amount at different temperatures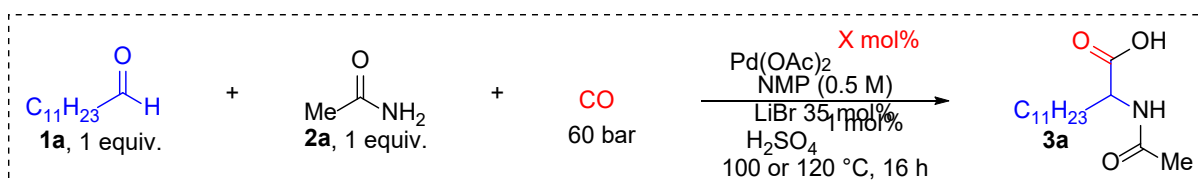

| Entry | $\text{Pd}(\text{OAc})_2$ (mol%) | 100 °C Yield (%) | 120 °C Yield (%) |
|-------|----------------------------------|------------------|------------------|
| 1     | 1.0                              | >99              | -                |
| 2     | 0.5                              | >99              | -                |
| 3     | 0.1                              | 80               | 72               |
| 4     | 0.05                             | 62               | 49               |
| 5     | 0.01                             | 23               | -                |

**Table 7.** Evaluation of LiBr amount

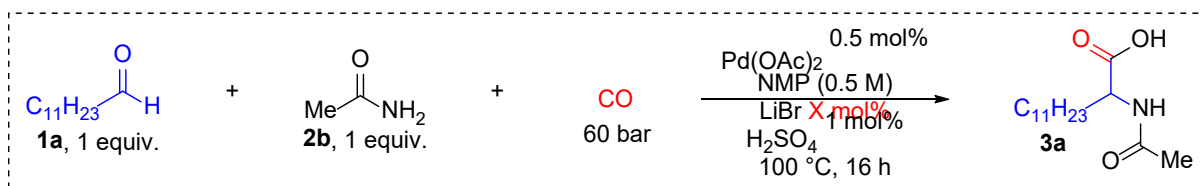

| Entry | LiBr (mol%) | Yield (%) |
|-------|-------------|-----------|
| 1     | 35          | <99       |
| 2     | 25          | 73        |
| 3     | 15          | 52        |
| 4     | 5           | 32        |

**Table 8.** Evaluation of lithium salt source

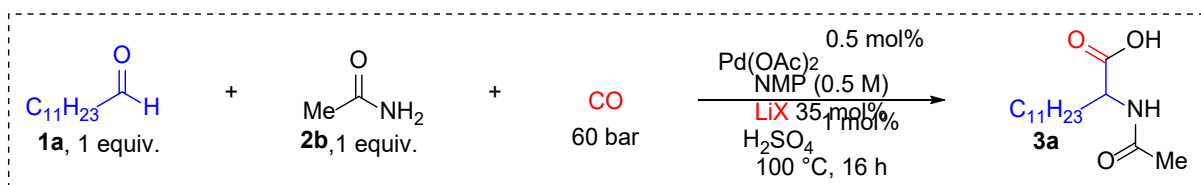

| Entry | LiX (mol%) | Yield (%) |
|-------|------------|-----------|
| 1     | LiCl       | 27        |
| 2     | LiBr       | >99       |

**Optimized condition:**

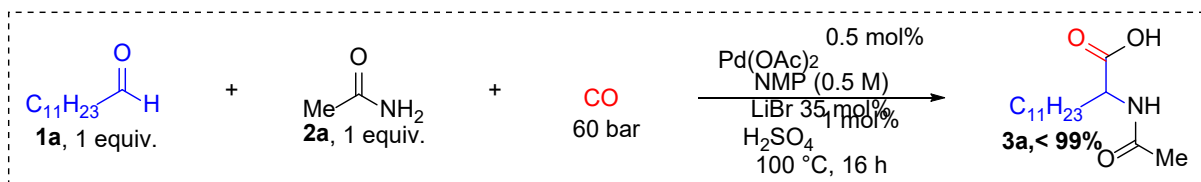

**Table 9.** Kinetics studies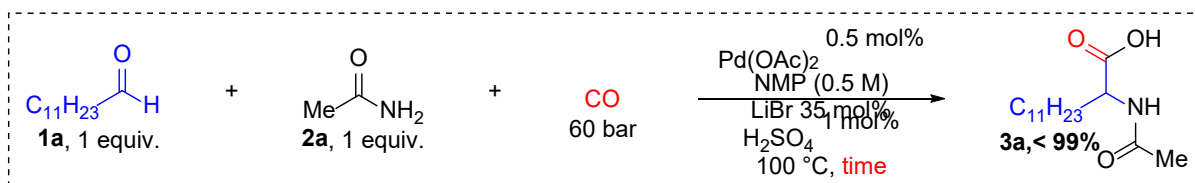

| Entry | Time (h)        | Aldehyde (%) | Amide (%) | Product (%) |
|-------|-----------------|--------------|-----------|-------------|
| 1     | 0               | 100          | 100       | 0           |
| 2     | 1               | 40           | 40        | 60          |
| 3     | 2               | 40           | 40        | 60          |
| 4     | 4               | 30           | 30        | 70          |
| 5     | 6               | 0            | 0         | 75          |
| 6     | 8               | 0            | 0         | 85          |
| 7     | 16              | 0            | 0         | 100         |
| 8     | 16+24           | 40           | 60        | 140         |
| 9     | 16 / without CO | 50           | 60        | 0           |

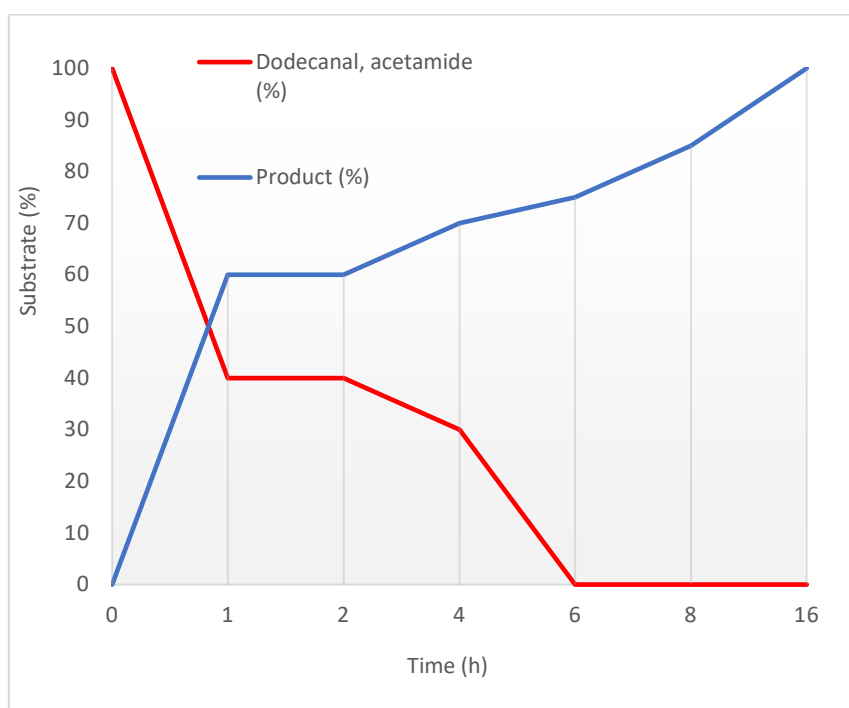

**Entry 8:** the same as entry 7, and after 16h, it was added all chemicals (NMP, LiBr, H<sub>2</sub>SO<sub>4</sub>, aldehyde, amide, CO) to reaction but Pd(OAc)<sub>2</sub> to see if the catalyst was still “alive” after 16h. It was observed formation of additional 40% of product after 24h, indicating the catalyst was alive, but a little bit “weak”.





## Characterization of the compounds

### 2-Acetamidotridecanoic acid (3a)

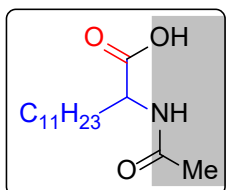

84% (109.3 mg, 0.423 mmol), white solid, MP = 104-105 °C.

Multi-gram scale: 72% (7.4611 g, 36.38 mmol).

**<sup>1</sup>H NMR (300 MHz, MeOD) δ** 4.34 (dd, J = 8.8, 5.0 Hz, 1H), 1.98 (s, 3H), 1.81 (ddd, J = 15.4, 7.3, 5.0 Hz, 1H), 1.74 – 1.59 (m, 1H), 1.30 (d, J = 3.4 Hz, 19H), 0.95 – 0.84 (m, 3H).

**<sup>13</sup>C NMR (75 MHz, MeOD) δ** 175.8, 173.3, 53.8, 33.1, 32.7, 30.7, 30.7, 30.5, 30.5, 30.2, 26.9, 23.7, 22.3, 14.4.

HRMS (ESI+) calculated for [C<sub>15</sub>H<sub>29</sub>NO<sub>3</sub>H]<sup>+</sup>: 272.2226, found: 272.2228.

### 2-Butyamidotridecanoic acid (3b)

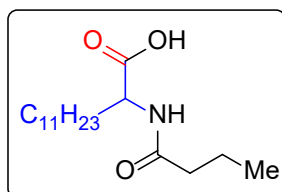

90% (134.7 mg, 0.45 mmol), white solid, MP = 82-83 °C.

**<sup>1</sup>H NMR (300 MHz, MeOD) δ** 4.36 (dd, J = 9.0, 4.9 Hz, 1H), 2.22 (dd, J = 7.8, 6.9 Hz, 2H), 1.83 (ddd, J = 15.3, 7.5, 4.9 Hz, 1H), 1.76 – 1.57 (m, 3H), 1.30 (d, J = 4.3 Hz, 18H), 1.00 – 0.85 (m, 6H).

**<sup>13</sup>C NMR (75 MHz, MeOD) δ** 176.2, 175.8, 53.5, 38.7, 33.1, 32.6, 30.7, 30.6, 30.5, 30.5, 30.2, 26.9, 23.7, 20.4, 14.4, 14.0.

HRMS (ESI+) calculated for [C<sub>17</sub>H<sub>33</sub>NO<sub>3</sub>Na]<sup>+</sup>: 322.2352, found: 322.2351.

### 2-Stearamidotridecanoic acid (3c)

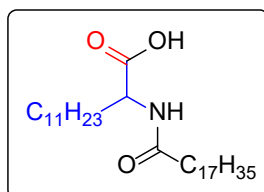

78% (193.9 mg, 0.39 mmol), white solid, MP = 84-85 °C.

**<sup>1</sup>H NMR (300 MHz, MeOD) δ** 4.37 (dd, J = 9.2, 4.7 Hz, 1H), 2.30 – 2.19 (m, 2H), 1.93 – 1.74 (m, 1H), 1.74 – 1.55 (m, 3H), 1.29 (d, J = 1.3 Hz, 47H), 0.95 – 0.85 (m, 6H).

**<sup>13</sup>C NMR (75 MHz, MeOD) δ** 176.4, 175.7, 53.5, 36.8, 33.1, 32.6, 30.8, 30.8, 30.5, 30.2, 26.9, 23.7, 14.5.

HRMS (ESI+) calculated for [C<sub>31</sub>H<sub>61</sub>NO<sub>3</sub>H]<sup>+</sup>: 496.4724, found: 496.4720.

### 2-Oleamidotridecanoic acid (3d)

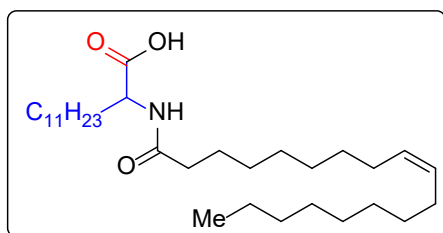

68% (167.9 mg, 0.34 mmol), colorless oil.

**<sup>1</sup>H NMR (300 MHz, CDCl<sub>3</sub>)** δ 6.02 (s, 1H), 5.44 – 5.27 (m, 2H), 4.59 (s, 1H), 2.23 (d, J = 7.8 Hz, 2H), 2.07 – 1.95 (m, 3H), 1.64 (s, 3H), 1.39 – 1.19 (m, 40H), 0.91 – 0.84 (m, 6H).

**<sup>13</sup>C NMR (75 MHz, CDCl<sub>3</sub>)** δ 176.0, 130.2, 129.9, 52.5, 36.7, 32.1, 29.9, 29.8, 29.7, 29.6, 29.5, 29.4, 27.4, 25.8, 25.4, 22.8, 14.3.

HRMS (ESI<sup>+</sup>) calculated for [C<sub>31</sub>H<sub>59</sub>NO<sub>3</sub>H]<sup>+</sup>: 494.4568, found: 494.4565.

### (Z)-2-(Docos-12-enamido)tridecanoic acid (3e)

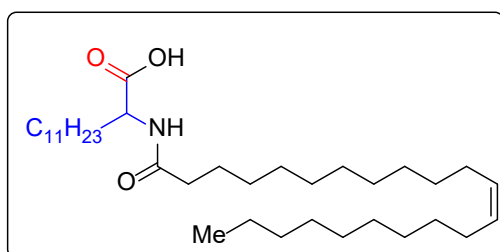

71% (196.1 mg, 0.36 mmol), white solid, MP = 63-64 °C.

**<sup>1</sup>H NMR (300 MHz, CDCl<sub>3</sub>)** δ 7.54 (s, 1H), 6.13 (d, J = 7.7 Hz, 1H), 5.36 – 5.32 (m, 2H), 4.59 (td, J = 7.5, 5.1 Hz, 1H), 2.24 (dd, J = 8.4, 6.7 Hz, 2H), 2.01 (q, J = 6.3 Hz, 3H), 1.87 (dd, J = 9.6, 5.0 Hz, 1H), 1.65 (dt, J = 15.1, 7.7 Hz, 3H), 1.38 – 1.21 (m, 47H), 0.92 – 0.84 (m, 6H).

**<sup>13</sup>C NMR (75 MHz, CDCl<sub>3</sub>)** δ 176.3, 174.1, 130.0, 130.0, 52.4, 36.7, 32.2, 32.1, 29.9, 29.9, 29.8, 29.7, 29.7, 29.7, 29.6, 29.5, 29.5, 29.4, 27.4, 25.8, 25.4, 22.8, 14.2.

HRMS (ESI<sup>+</sup>) calculated for [C<sub>35</sub>H<sub>67</sub>NO<sub>3</sub>H]<sup>+</sup>: 550.5194, found: 550.5204.

### 2-Methacrylamidotridecanoic acid (3f)

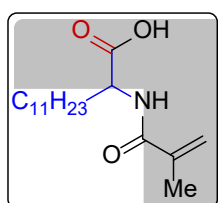

55% (81.5 mg, 0.27 mmol), white solid, MP = 81-82 °C.

**<sup>1</sup>H NMR (300 MHz, CDCl<sub>3</sub>)** δ 6.30 (d, J = 7.6 Hz, 1H), 5.81 – 5.73 (m, 1H), 5.45 – 5.37 (m, 1H), 4.64 (td, J = 7.4, 5.3 Hz, 1H), 1.99 (d, J = 1.3 Hz, 3H), 1.95 – 1.86 (m, 1H), 1.80 – 1.69 (m, 1H), 1.25 (s, 18H), 0.90 – 0.85 (m, 3H).

**<sup>13</sup>C NMR (75 MHz, CDCl<sub>3</sub>)** δ 176.2, 168.7, 139.3, 121.0, 52.6, 32.2, 32.0, 29.7, 29.7, 29.5, 29.5, 29.4, 25.4, 22.8, 18.6, 14.3.

HRMS (ESI<sup>+</sup>) calculated for [C<sub>17</sub>H<sub>31</sub>NO<sub>3</sub>Na]<sup>+</sup>: 320.2196, found: 320.2202.

## 2-(Cyclohexancarboxamido)tridecanoic acid (3g)

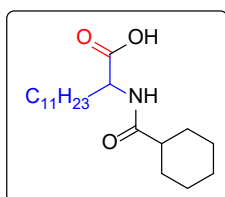

75% (150,5 mg, 0.38 mmol), white solid, MP = 118-119 °C.

**<sup>1</sup>H NMR (300 MHz, MeOD) δ** 4.32 (dd, J = 8.7, 4.9 Hz, 1H), 2.33 – 2.20 (m, 1H), 1.88 – 1.74 (m, 5H), 1.73 – 1.62 (m, 2H), 1.47-1.19 (m, 24H), 0.95 – 0.86 (m, 3H).

**<sup>13</sup>C NMR (75 MHz, MeOD) δ** 178.9, 53.9, 46.2, 33.1, 33.0, 30.9, 30.8, 30.7, 30.6, 30.6, 30.5, 30.4, 30.2, 26.9, 26.8, 26.8, 26.7, 23.7, 14.4.

HRMS (ESI+) calculated for [C<sub>20</sub>H<sub>37</sub>NO<sub>3</sub>H]<sup>+</sup>: 340.2852, found: 340.2852.

## 2-Benzamidotridecanoic acid (3h)

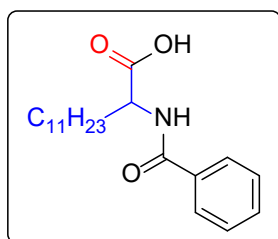

75% (125.0 mg, 0.37 mmol), white solid, MP = 69-70 °C.

**<sup>1</sup>H NMR (300 MHz, MeOD) δ** 7.91 – 7.82 (m, 2H), 7.57 – 7.41 (m, 3H), 4.47 (dd, J = 7.4, 4.9 Hz, 1H), 2.03 – 1.91 (m, 1H), 1.86 – 1.72 (m, 1H), 1.47 – 1.18 (m, 20H), 0.92 – 0.85 (m, 3H).

**<sup>13</sup>C NMR (75 MHz, MeOD) δ** 179.3, 169.1, 136.0, 132.5, 129.5, 128.2, 56.9, 34.1, 33.1, 30.7, 30.7, 30.6, 30.4, 26.8, 24.2, 23.7,

14.4.

HRMS (ESI+) calculated for [C<sub>20</sub>H<sub>31</sub>NO<sub>3</sub>H]<sup>+</sup>: 334.2377, found: 334.2382.

## 2-(4-Methoxybenzamido)tridecanoic acid (3i)

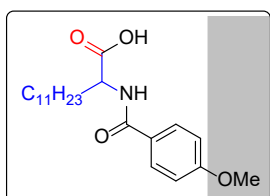

63% (115.1 mg, 0.32 mmol), white solid, MP = 85-86 °C.

**<sup>1</sup>H NMR (300 MHz, MeOD) δ** 7.88 – 7.78 (m, 2H), 7.03 – 6.93 (m, 2H), 4.56 (dd, J = 9.2, 5.1 Hz, 1H), 3.85 (s, 3H), 2.03 – 1.89 (m, 1H), 1.81 (ddd, J = 14.1, 9.2, 5.9 Hz, 1H), 1.54 – 0.96 (m, 19H), 0.92 – 0.84 (m, 3H).

**<sup>13</sup>C NMR (75 MHz, MeOD) δ** 176.0, 169.9, 164.0, 130.4, 127.4, 114.7, 55.9, 54.2, 33.1, 32.5, 30.7, 30.7, 30.6, 30.5, 30.5, 30.2, 27.1, 23.7, 14.4.

HRMS (ESI+) calculated for [C<sub>21</sub>H<sub>33</sub>NO<sub>4</sub>Na]<sup>+</sup>: 386.2302, found: 386.2298.

## 2-(3-Carboxypropanamido)tridecanoic acid (3j)

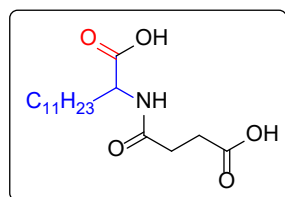

34% (56.8 mg, 0.17 mmol), white solid, MP = 103-104 °C.

**<sup>1</sup>H NMR (300 MHz, MeOD) δ** 4.36 (dd, J = 8.7, 5.0 Hz, 1H), 2.65 – 2.51 (m, 4H), 1.82 (qd, J = 7.5, 5.1 Hz, 1H), 1.66 (ddd, J = 14.2, 8.7, 5.7 Hz, 1H), 1.30 (d, J = 4.6 Hz, 21H), 0.92 – 0.87 (m, 3H).

**<sup>13</sup>C NMR (75 MHz, MeOD) δ** 176.2, 174.5, 53.7, 33.1, 32.7, 31.4, 30.7, 30.7, 30.5, 30.5, 30.3, 26.8, 23.7, 14.4.

HRMS (ESI+) calculated for [C<sub>17</sub>H<sub>31</sub>NO<sub>5</sub>H]<sup>+</sup>: 330.2275, found: 330.2280.

### 2-(2-(2-Oxopyrrolidin-1-yl)acetamido)tridecanoic acid (3k)

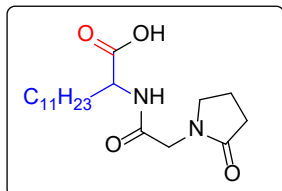

77% (135.8 mg, 0.38 mmol), white solid, MP = 90-91 °C.

**<sup>1</sup>H NMR (300 MHz, CDCl<sub>3</sub>) δ** 6.85 (d, J = 7.8 Hz, 1H), 4.53 (td, J = 7.6, 5.3 Hz, 1H), 4.05 (dd, J = 66.2, 15.1 Hz, 2H), 3.61 – 3.48 (m, 2H), 2.46 (dd, J = 8.8, 6.6 Hz, 2H), 2.14 – 2.06 (m, 2H), 1.85 (dq, J = 10.6, 5.4 Hz, 1H), 1.67 (dt, J = 14.6, 7.5 Hz, 1H), 1.25 (s, 18H), 0.89 (d, J = 6.5 Hz, 3H).

**<sup>13</sup>C NMR (75 MHz, CDCl<sub>3</sub>) δ** 177.0, 174.6, 168.1, 52.4, 48.9, 32.1, 32.1, 30.7, 29.8, 29.7, 29.6, 29.5, 29.4, 25.5, 22.8, 18.1, 14.3.

HRMS (ESI+) calculated for [C<sub>19</sub>H<sub>34</sub>N<sub>2</sub>O<sub>4</sub>Na]<sup>+</sup>: 377.2411, found: 377.2415.

### 2-(N-Methylacetamido)tridecanoic acid (3l)

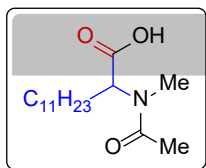

9% (12.7 mg, 0.044 mmol), white solid.

**<sup>1</sup>H NMR (400 MHz, CDCl<sub>3</sub>) δ** 5.02 (dd, J = 10.2, 5.5 Hz, 1H), 2.96 (s, 3H), 2.16 (s, 3H), 2.04 – 1.96 (m, 1H), 1.73 (dt, J = 13.7, 9.4 Hz, 1H), 1.25 (d, J = 2.5 Hz, 19H), 0.89 (d, J = 6.7 Hz, 3H).

**<sup>13</sup>C NMR (101 MHz, CDCl<sub>3</sub>) δ** 174.5, 172.9, 57.5, 33.1, 32.1, 29.9, 29.8, 29.7, 29.5, 29.5, 29.3, 28.4, 26.3, 22.8, 22.1, 14.3.

HRMS (ESI+) calculated for [C<sub>16</sub>H<sub>31</sub>NO<sub>3</sub>Na]<sup>+</sup>: 308.2196, found: 308.2199.

### 2-Acetamido-2-phenylacetic acid (3m)

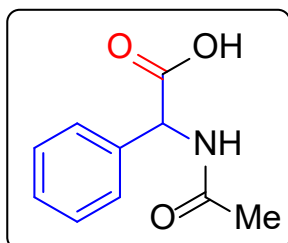

83% (80.0 mg, 0.41 mmol), pale yellow solid, MP = 199-200 °C.

**<sup>1</sup>H NMR (300 MHz, MeOD) δ** 7.43 – 7.33 (m, 5H), 5.44 (s, 1H), 2.01 (s, 3H).

**<sup>13</sup>C NMR (75 MHz, MeOD) δ** 173.7, 172.9, 138.0, 129.8, 129.4, 128.8, 58.2, 22.3.

HRMS (ESI+) calculated for [C<sub>10</sub>H<sub>11</sub>NO<sub>3</sub>Na]<sup>+</sup>: 216.0631, found: 216.0634.

### 2-Oleamido-2-phenylacetic acid (3n)

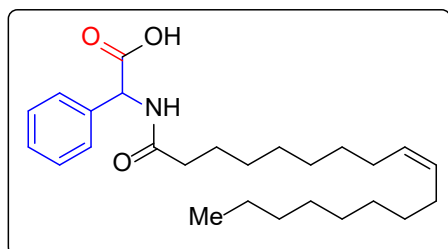

31% (66.1 mg, 0.16 mmol), colorless oil.

**<sup>1</sup>H NMR (300 MHz, MeOD) δ** 7.50 – 7.19 (m, 5H), 5.45 (s, 1H), 5.34 (td, J = 4.5, 2.2 Hz, 2H), 2.27 (td, J = 7.3, 1.0 Hz, 2H), 2.09 – 1.92 (m, 3H), 1.61 (t, J = 7.2 Hz, 2H), 1.47 – 1.17 (m, 21H), 0.95 – 0.85 (m, 3H).

**<sup>13</sup>C NMR (75 MHz, MeOD) δ** 175.9, 173.8, 138.3, 130.8, 130.8, 129.8, 129.3, 128.8, 58.2, 36.6, 33.1, 30.8, 30.8, 30.7, 30.6, 30.5, 30.4, 30.3, 30.2, 30.2, 28.1, 28.1, 26.9, 23.7, 14.4.

HRMS (ESI+) calculated for [C<sub>26</sub>H<sub>41</sub>NO<sub>3</sub>Na]<sup>+</sup>: 438.2979, found: 438.2984.

### (Z)-2-(Docos-12-enamido)-2-phenylacetic acid (3o)

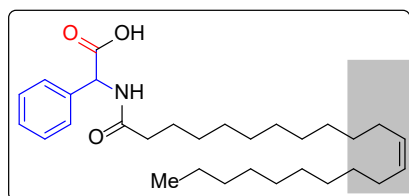

65% (153.9 mg, 0.33 mmol), pale yellow oil.

**<sup>1</sup>H NMR (300 MHz, MeOD) δ** 7.46 – 7.28 (m, 5H), 5.46 (s, 1H), 5.42 – 5.27 (m, 2H), 2.27 (td, J = 7.3, 1.0 Hz, 2H), 2.09 – 1.98 (m, 3H), 1.61 (dd, J = 10.3, 4.7 Hz, 3H), 1.44 – 1.22 (m, 30H), 0.92 – 0.88 (m, 3H).

**<sup>13</sup>C NMR (75 MHz, MeOD) δ** 180.4, 175.8, 173.7, 138.2, 130.8, 129.7, 129.3, 128.8, 58.0, 47.0, 36.6, 33.6, 33.1, 33.0, 30.9, 30.8, 30.7, 30.6, 30.5, 30.4, 30.3, 30.2, 28.5, 28.2, 26.9, 23.7, 23.7, 14.5, 14.5.

HRMS (ESI+) calculated for [C<sub>30</sub>H<sub>49</sub>NO<sub>3</sub>H]<sup>+</sup>: 472.3785, found: 472.3789.

### 2-(4-Methoxybenzamido)-2-phenylacetic acid (3p)

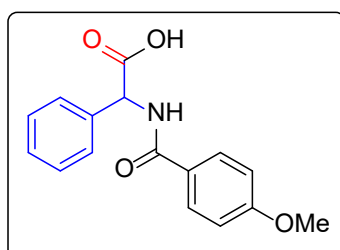

38% (54.3 mg, 0.19 mmol), white solid, MP = 186-188 °C.

**<sup>1</sup>H NMR (300 MHz, MeOD) δ** 7.89 – 7.81 (m, 2H), 7.54 – 7.46 (m, 2H), 7.42 – 7.28 (m, 3H), 7.01 – 6.94 (m, 2H), 5.64 (s, 1H), 3.84 (s, 3H), 2.15 (s, 1H).

**<sup>13</sup>C NMR (75 MHz, MeOD) δ** 174.2, 169.3, 164.1, 138.6, 130.5, 129.7, 129.2, 128.9, 127.2, 114.7, 58.8, 55.9.

HRMS (ESI+) calculated for [C<sub>16</sub>H<sub>15</sub>NO<sub>4</sub>Na]<sup>+</sup>: 308.0893, found: 308.0894.

### 2-(4-Methoxybenzamido)-3,7-dimethyloct-6-enoic acid (3q)

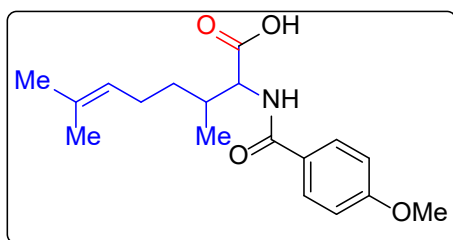

35% (55.1 mg, 0.17 mmol), white solid. MP: 146-147°C

**<sup>1</sup>H NMR (300 MHz, CDCl<sub>3</sub>)** δ 7.68 – 7.63 (m, 2H), 6.86 – 6.82 (m, 2H), 5.86 (d, J = 7.8 Hz, 1H), 4.48 (s, 1H), 3.77 (s, 3H), 2.32 – 2.20 (m, 2H), 2.06 – 1.97 (m, 1H), 1.84 – 1.74 (m, 1H), 1.60 (d, J = 1.3

Hz, 6H), 1.36 – 1.23 (m, 1H), 0.98 (d, J = 6.9 Hz, 3H).

**<sup>13</sup>C NMR (75 MHz, CDCl<sub>3</sub>)** δ 166.2, 162.1, 135.6, 129.1, 128.7, 127.3, 124.5, 113.8, 58.9, 55.5, 43.0, 31.3, 29.0, 21.9, 20.9, 18.1.

HRMS (ESI+) calculated for [C<sub>18</sub>H<sub>25</sub>NO<sub>4</sub>Na]<sup>+</sup>: 342.1676 found: 342.1689.

### (Z)-2-Acetamidoundec-5-enoic acid (3r)

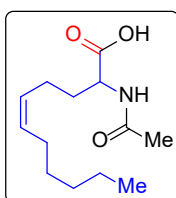

85% (102.7 mg, 0.426 mmol), colorless oil.

**<sup>1</sup>H NMR (300 MHz, MeOD)** δ 5.51 – 5.28 (m, 2H), 4.35 (dd, J = 9.0, 4.8 Hz, 1H), 2.23 – 1.99 (m, 4H), 1.99 (s, 3H), 1.91 – 1.80 (m, 1H), 1.78 – 1.66 (m, 1H), 1.39 – 1.25 (m, 8H), 0.92 – 0.88 (m, 3H).

**<sup>13</sup>C NMR (75 MHz, MeOD)** δ 175.6, 173.3, 132.5, 128.8, 53.3, 32.7, 32.6, 30.5, 28.1, 24.5, 23.6, 22.3, 14.4.

HRMS (ESI+) calculated for [C<sub>13</sub>H<sub>23</sub>NO<sub>3</sub>H]<sup>+</sup>: 242.1751, found: 242.1753.

### (Z)-2-Oleamidoundec-5-enoic acid (3s)

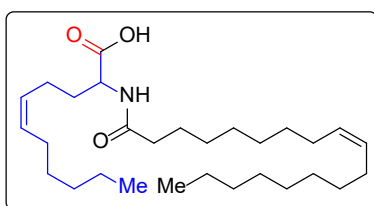

57% (133.0 mg, 0.29 mmol), colorless oil.

**<sup>1</sup>H NMR (300 MHz, MeOD)** δ 5.42 – 5.31 (m, 4H), 4.26 (dd, J = 7.9, 4.4 Hz, 1H), 2.24 (dt, J = 7.2, 3.4 Hz, 2H), 2.03 (q, J = 6.3 Hz, 6H), 1.72 – 1.56 (m, 4H), 1.36 – 1.28 (m, 30H), 0.90 (q, J = 2.5 Hz, 6H).

**<sup>13</sup>C NMR (75 MHz, MeOD)** δ 179.3, 175.3, 131.3, 130.8, 130.8, 130.0, 56.0, 37.4, 34.1, 33.1, 32.7, 30.9, 30.8, 30.8, 30.8, 30.6, 30.6, 30.5, 30.4, 30.4, 30.3, 30.3, 28.2, 28.1, 27.1, 24.7, 23.7, 23.7, 14.5.

HRMS (ESI+) calculated for [C<sub>29</sub>H<sub>53</sub>NO<sub>3</sub>Na]<sup>+</sup>: 486.3918, found: 486.3924.

### (Z)-2-(Cyclohexancarboxamido)undec-5-enoic acid (3t)

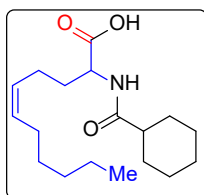

69% (106.6 mg, 0.343 mmol), colorless oil.

**<sup>1</sup>H NMR (300 MHz, MeOD) δ** 5.50 – 5.28 (m, 2H), 4.34 (dd, J = 9.3, 4.6 Hz, 1H), 2.32 – 2.01 (m, 5H), 1.93 – 1.55 (m, 10H), 1.36 – 1.29 (m, 10H), 0.90 (d, J = 2.0 Hz, 3H).

**<sup>13</sup>C NMR (75 MHz, MeOD) δ** 179.3, 175.8, 132.4, 128.9, 52.9, 46.1, 32.7, 32.6, 30.9, 30.5, 30.4, 28.2, 26.9, 26.8, 26.7, 24.6, 23.6, 14.4.

HRMS (ESI+) calculated for [C<sub>18</sub>H<sub>31</sub>NO<sub>3</sub>H]<sup>+</sup>: 310.2377, found: 310.2383.

### (Z)-2-(4-Methoxybenzamido)undec-5-enoic acid (3u)

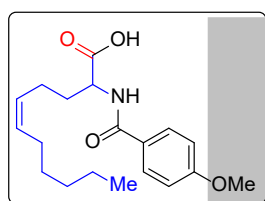

85% (142.4 mg, 0.427 mmol), colorless oil.

**<sup>1</sup>H NMR (300 MHz, MeOD) δ** 7.90 – 7.79 (m, 2H), 7.03 – 6.94 (m, 2H), 5.51 – 5.31 (m, 2H), 4.55 (dd, J = 9.4, 4.9 Hz, 1H), 3.85 (d, J = 0.7 Hz, 3H), 2.42 – 2.15 (m, 2H), 2.07 – 1.84 (m, 2H), 1.63 – 1.43 (m, 3H), 1.32 – 1.22 (m, 7H), 0.90 – 0.81 (m, 3H).

**<sup>13</sup>C NMR (75 MHz, MeOD) δ** 176.0, 169.9, 164.0, 132.6, 130.4, 128.9, 127.4, 114.7, 55.9, 32.8, 32.7, 32.4, 30.5, 28.2, 24.7, 23.5, 14.4.

HRMS (ESI+) calculated for [C<sub>19</sub>H<sub>27</sub>NO<sub>4</sub>H]<sup>+</sup>: 334.2013 found: 334.2020.

### (Z)-2-(N-Methylacetamido)undec-5-enoic acid (3v)

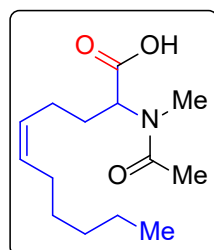

23% (29.5 mg, 0.11 mmol), colorless oil.

**<sup>1</sup>H NMR (300 MHz, MeOD) δ** 5.46 – 5.37 (m, 2H), 5.06 – 5.00 (m, 1H), 3.00 (s, 3H), 2.81 (s, 1H), 2.14 (s, 3H), 2.06 – 2.01 (m, 4H), 1.35 – 1.29 (m, 8H), 0.90 (d, J = 0.7 Hz, 3H).

**<sup>13</sup>C NMR (75 MHz, MeOD) δ** 174.5, 174.4, 132.3, 129.0, 61.2, 57.4, 35.3, 33.1, 32.7, 30.5, 29.7, 23.6, 23.4, 14.4.

HRMS (ESI+) calculated for [C<sub>14</sub>H<sub>25</sub>NO<sub>3</sub>Na]<sup>+</sup>: 278.1726 found: 278.1733.

### Deuteration reaction

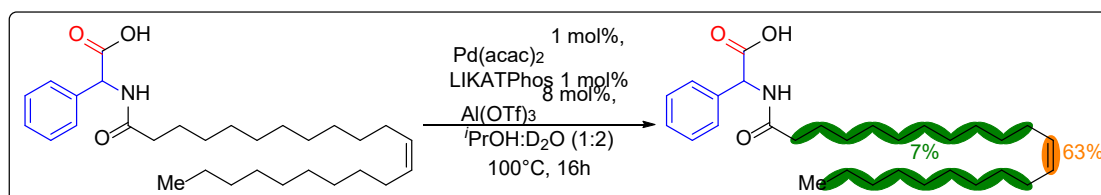



## X-Ray Diffraction

### X-ray crystal structure analysis of **3f**

Data were collected on a Bruker Kappa APEX II Duo diffractometer. The structure was solved by intrinsic phasing (SHELXT: Sheldrick, G. M. *Acta Cryst.* **2015**, A71, 3.) and refined by full-matrix least-squares procedures on  $F^2$  (SHELXL-2019: Sheldrick, G. M. *Acta Cryst.* **2015**, C71, 3.). XP (Bruker AXS) was used for graphical representation. CCDC 2332462 contains the supplementary crystallographic data for this paper. These data are provided free of charge by the joint Cambridge Crystallographic Data Centre and Fachinformationszentrum Karlsruhe Access Structures service [www.ccdc.cam.ac.uk/structures](http://www.ccdc.cam.ac.uk/structures).

Crystal data of **3f**:  $C_{17}H_{31}NO_3$ ,  $M = 297.43$ , triclinic, space group  $P\bar{1}$ ,  $a = 5.0699(3)$ ,  $b = 9.3359(5)$ ,  $c = 19.6712(11)$  Å,  $\alpha = 92.250(3)$ ,  $\beta = 96.251(3)$ ,  $\gamma = 103.900(3)^\circ$ ,  $V = 896.37(9)$  Å<sup>3</sup>,  $T = 150(2)$  K,  $Z = 2$ , 13069 reflections measured, 3133 independent reflections ( $R_{int} = 0.0242$ ), final  $R$  values ( $I > 2\sigma(I)$ ):  $R_1 = 0.0508$ ,  $wR_2 = 0.1414$ , final  $R$  values (all data):  $R_1 = 0.0567$ ,  $wR_2 = 0.1477$ , 199 parameters.

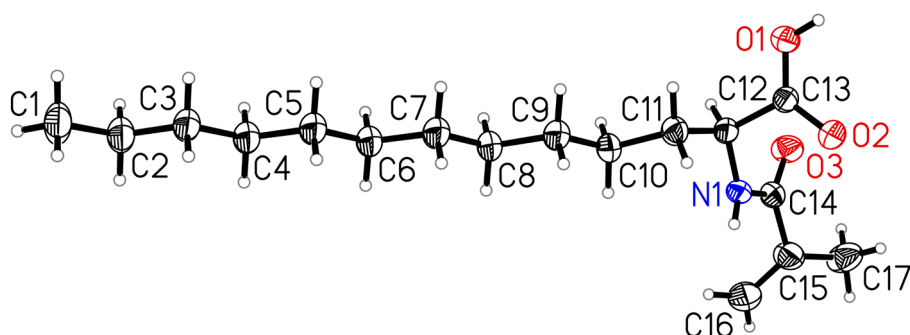

**Figure S1.** Molecular structure of **3f**. Displacement ellipsoids correspond to 50% probability. The distances C13-O1 (1.2582(19) Å) and C13-O2 (1.2655(19) Å) are between a single and a double bond due to unresolved disorder.

## NMR Spectra

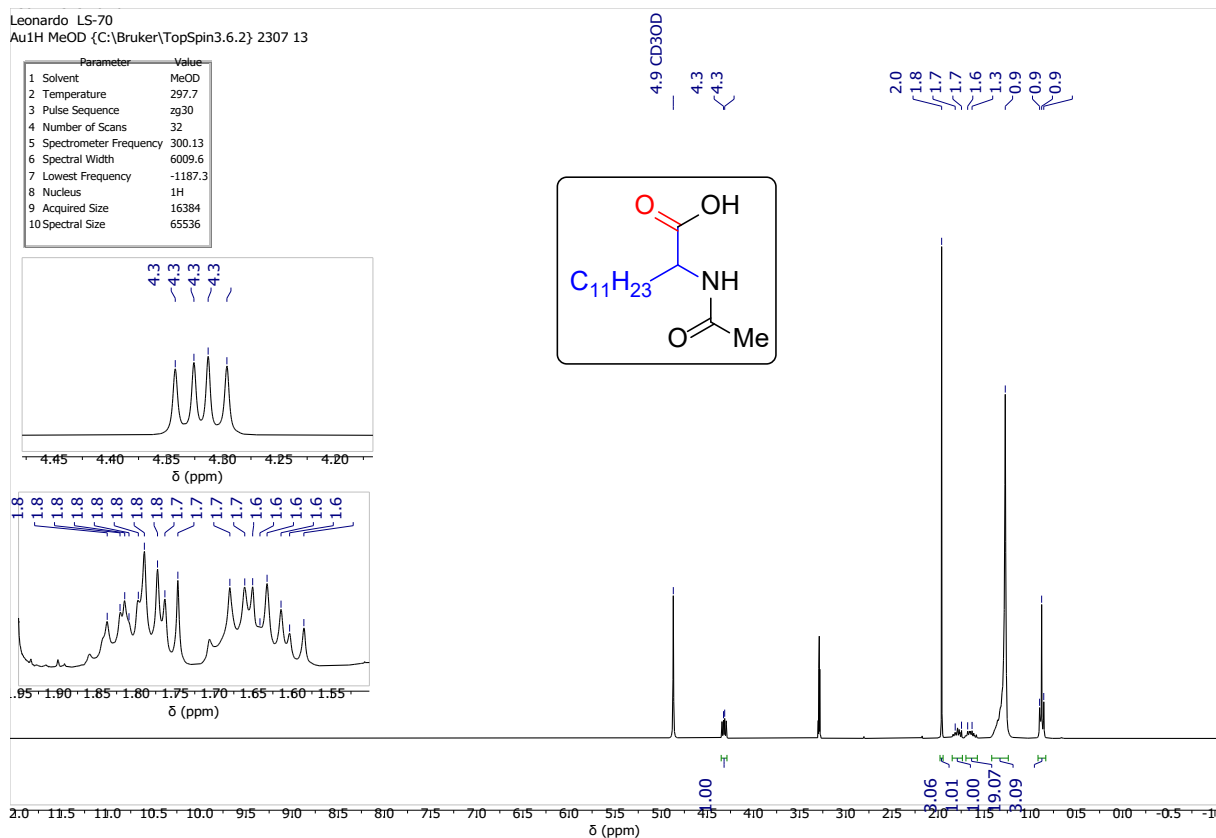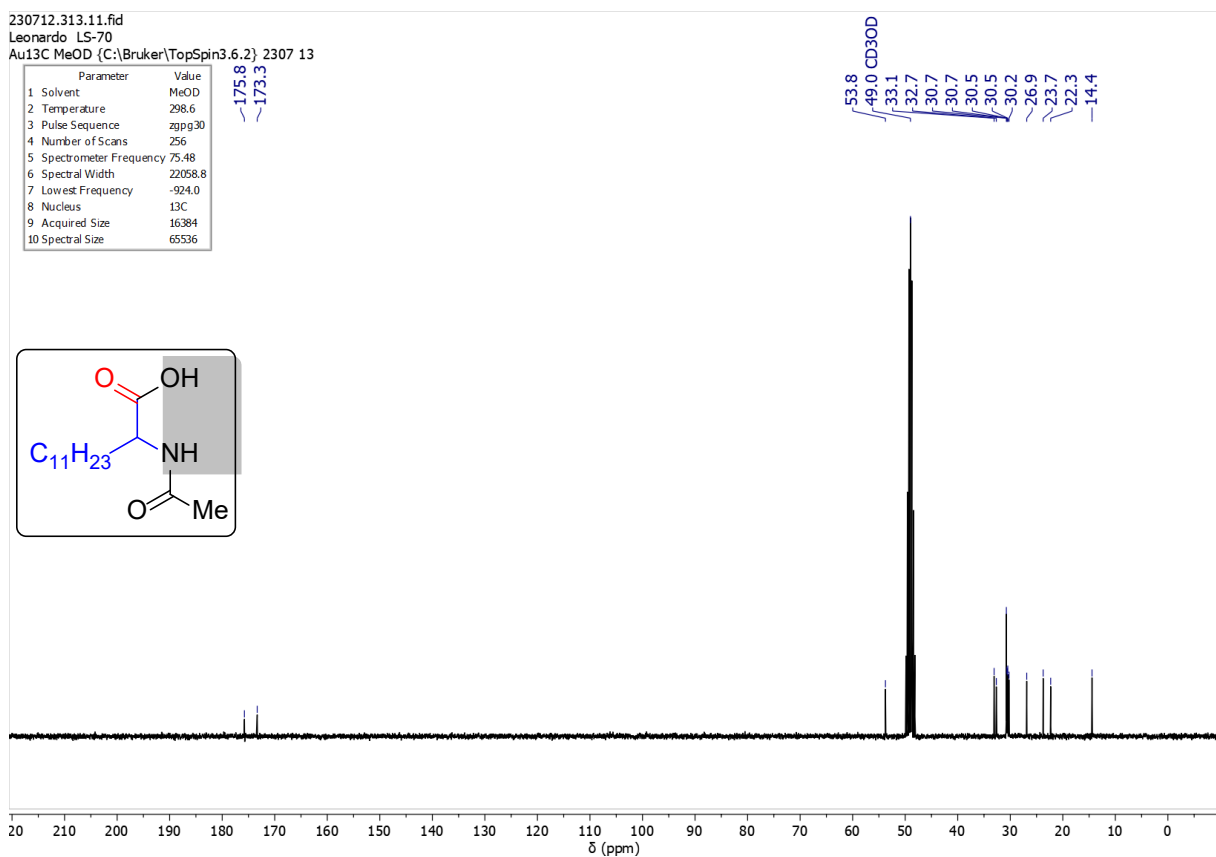

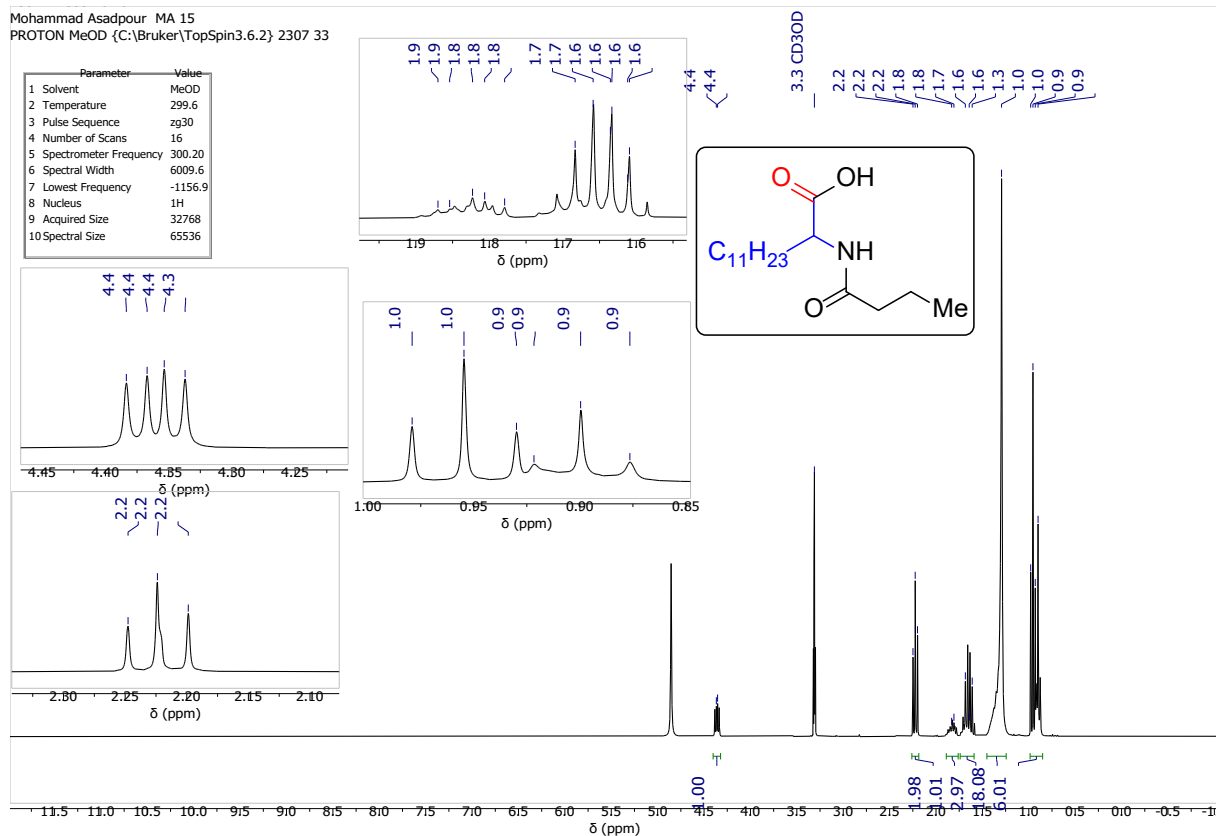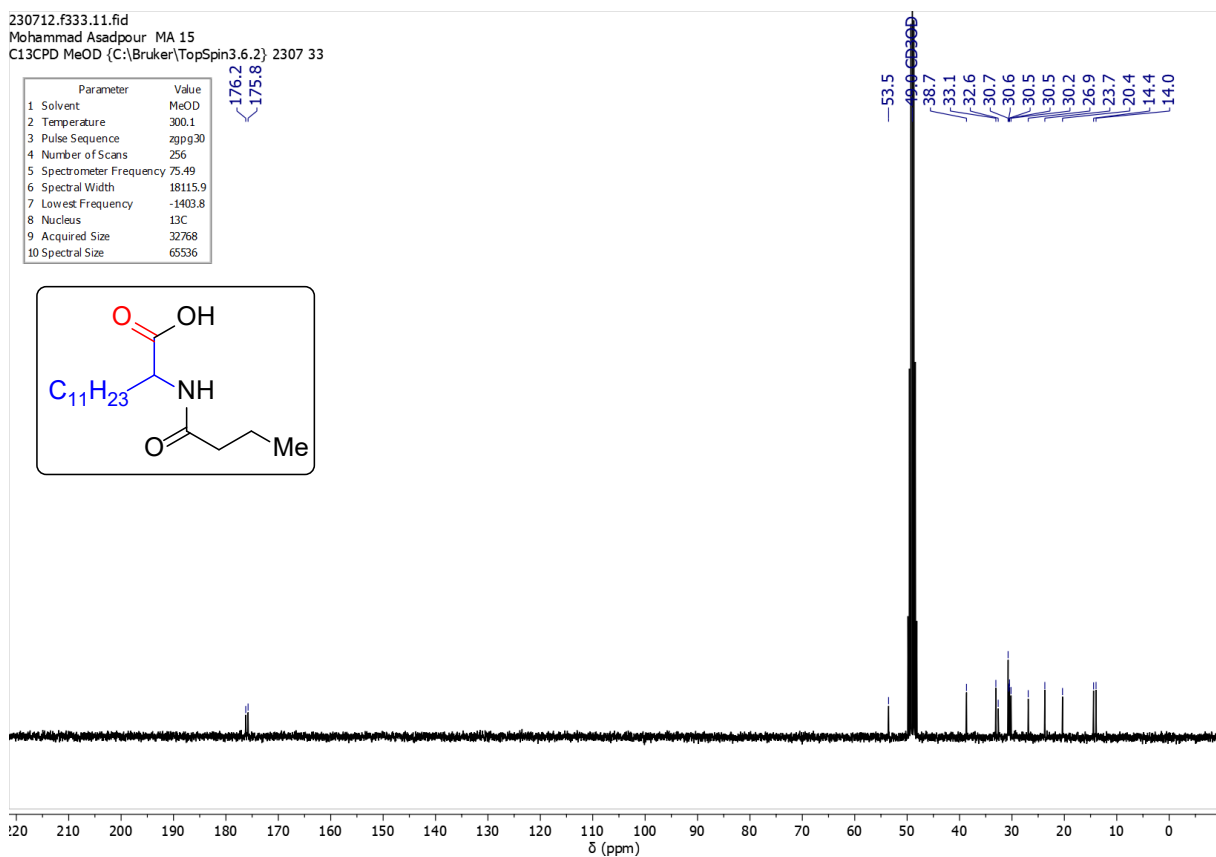

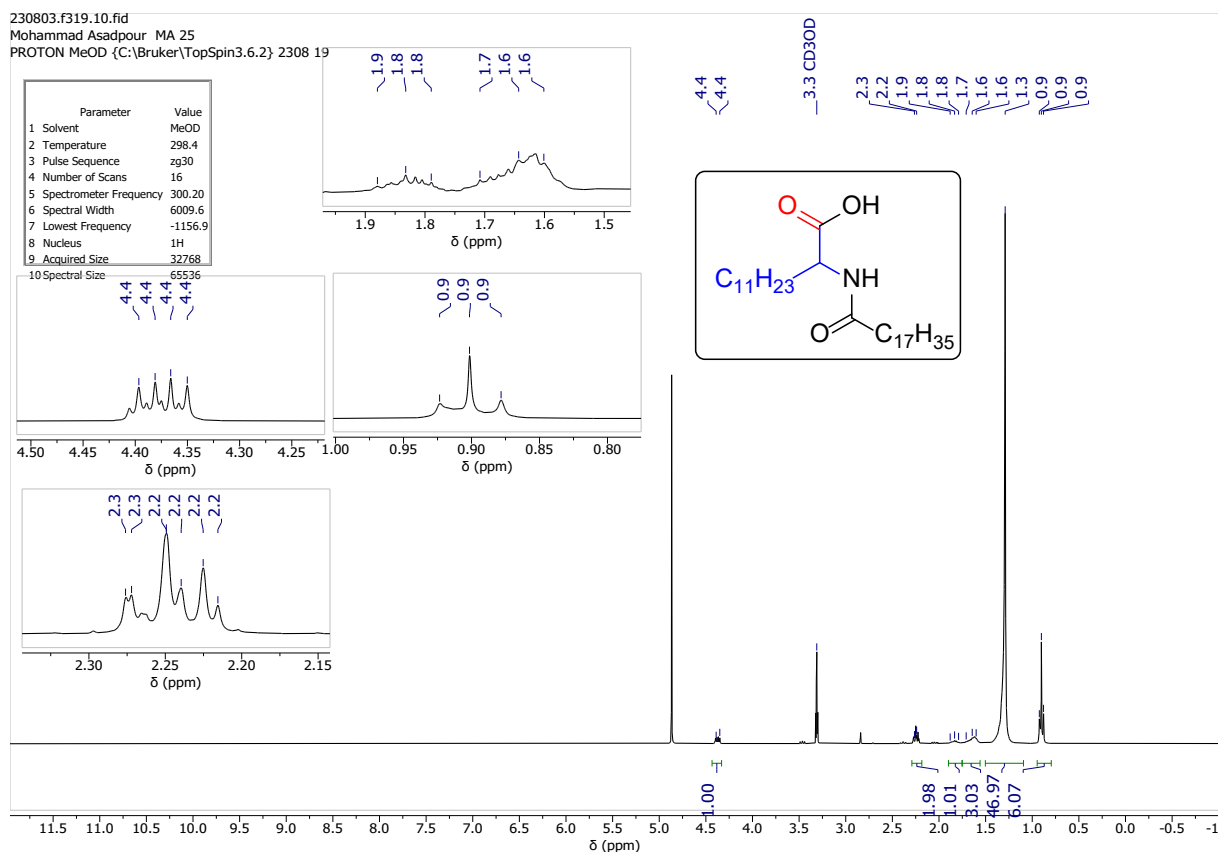

Figure S6: <sup>1</sup>H NMR of compound (3c).

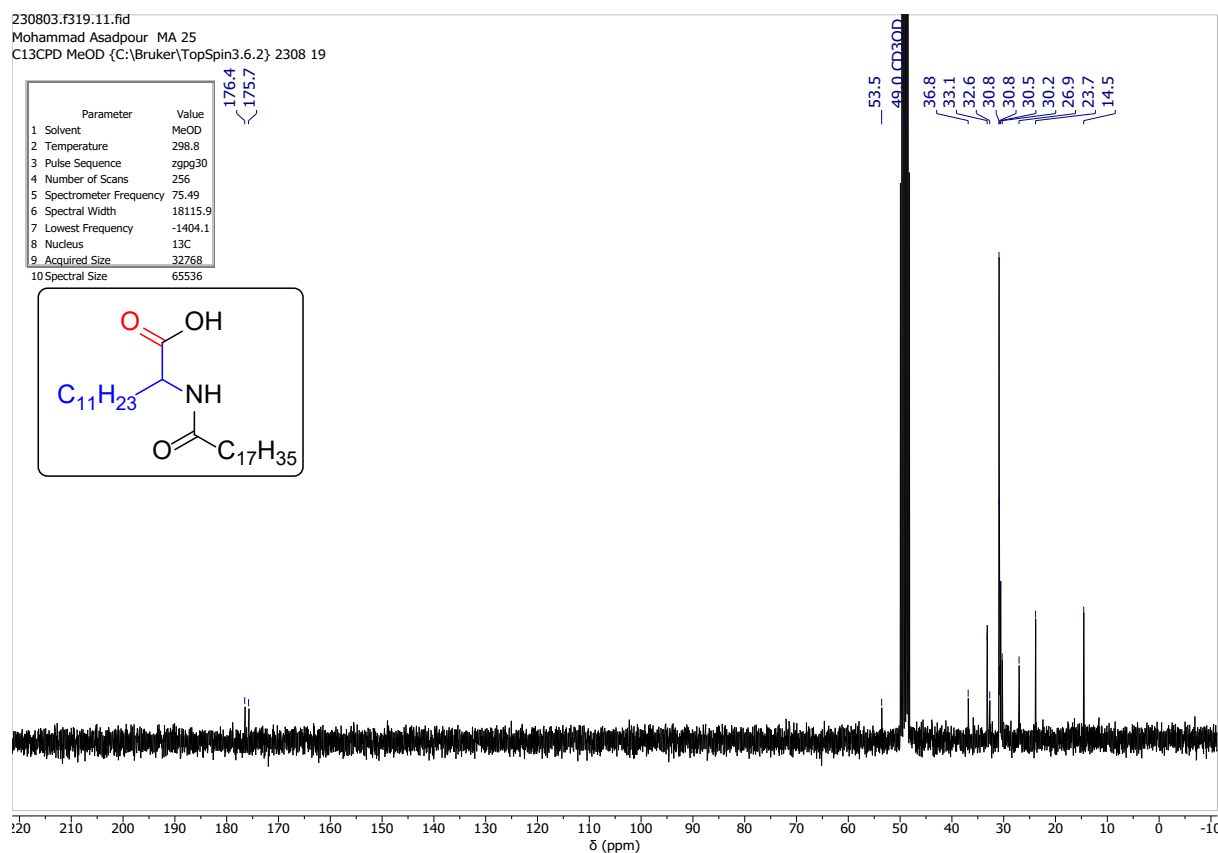

Figure S7: <sup>13</sup>C NMR of compound (3c).

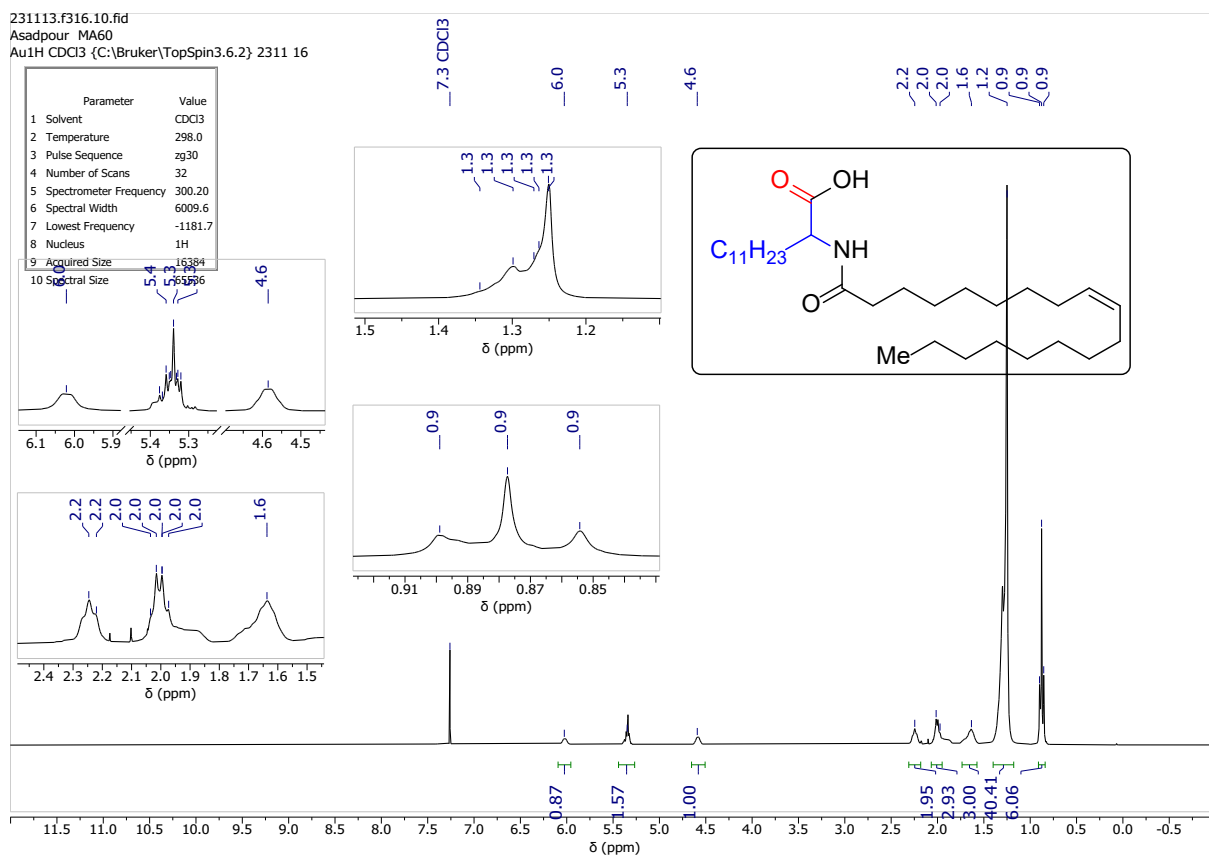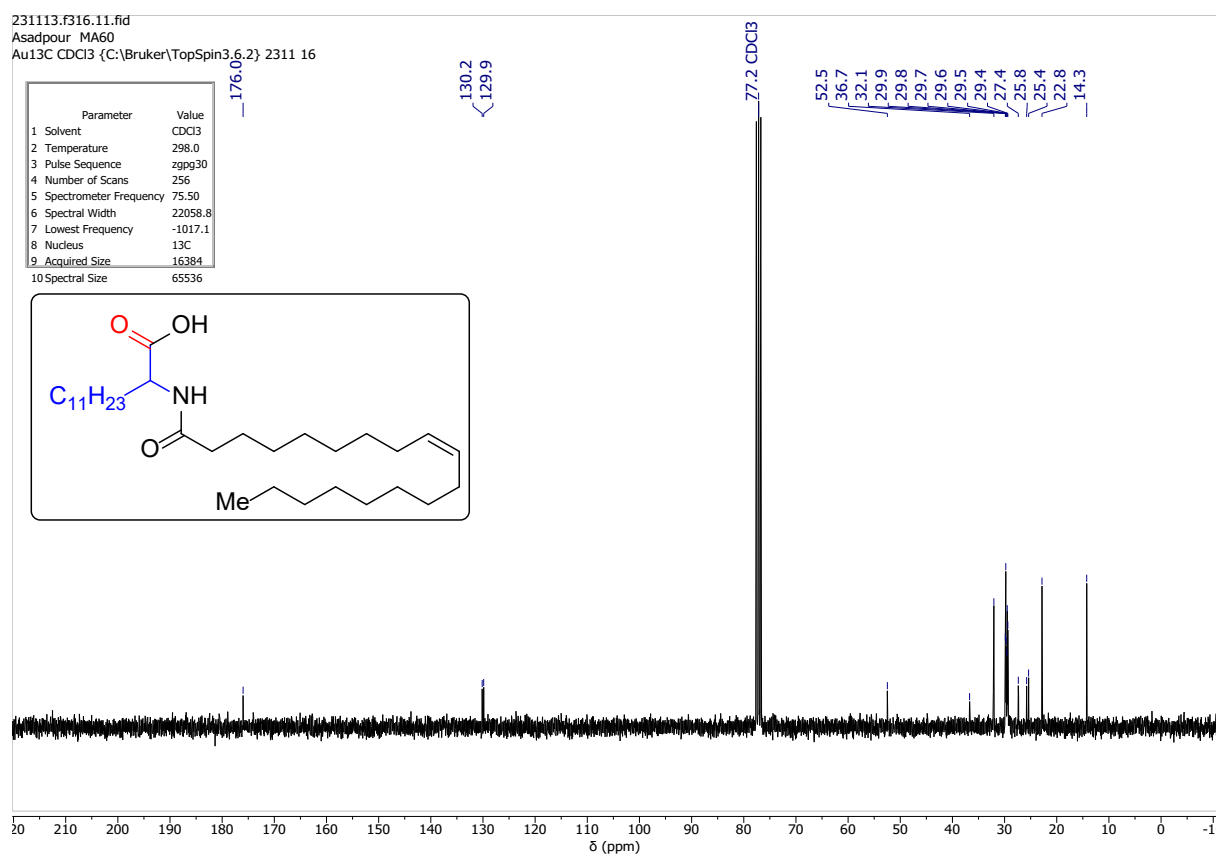

230823.f304.10.fid  
 Mohammad Asadpour MA 36.1  
 PROTON CDCl3 {C:\Bruker\TopSpin3.6.2} 2308 4

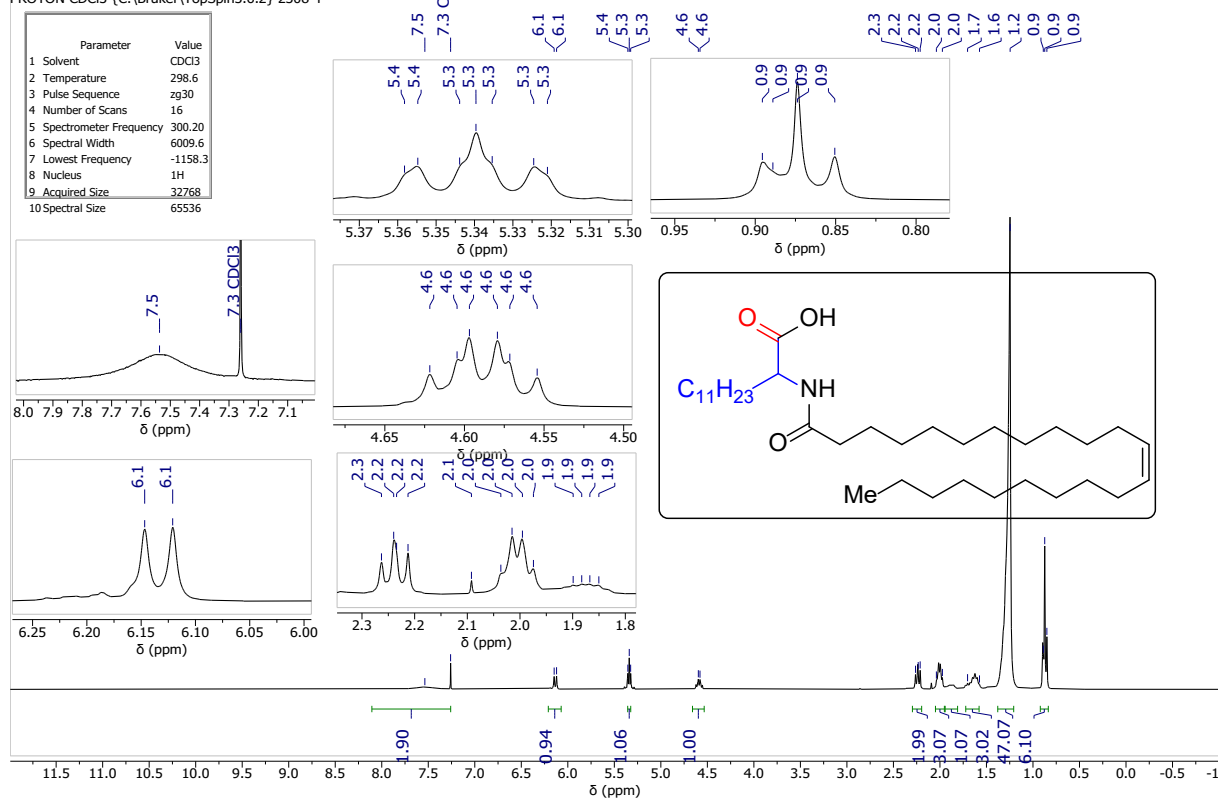

Figure S10:  $^1\text{H}$  NMR of compound (3e).

230823.f304.11.fid  
 Mohammad Asadpour MA 36.1  
 C13CPD CDCl3 {C:\Bruker\TopSpin3.6.2} 2308 4

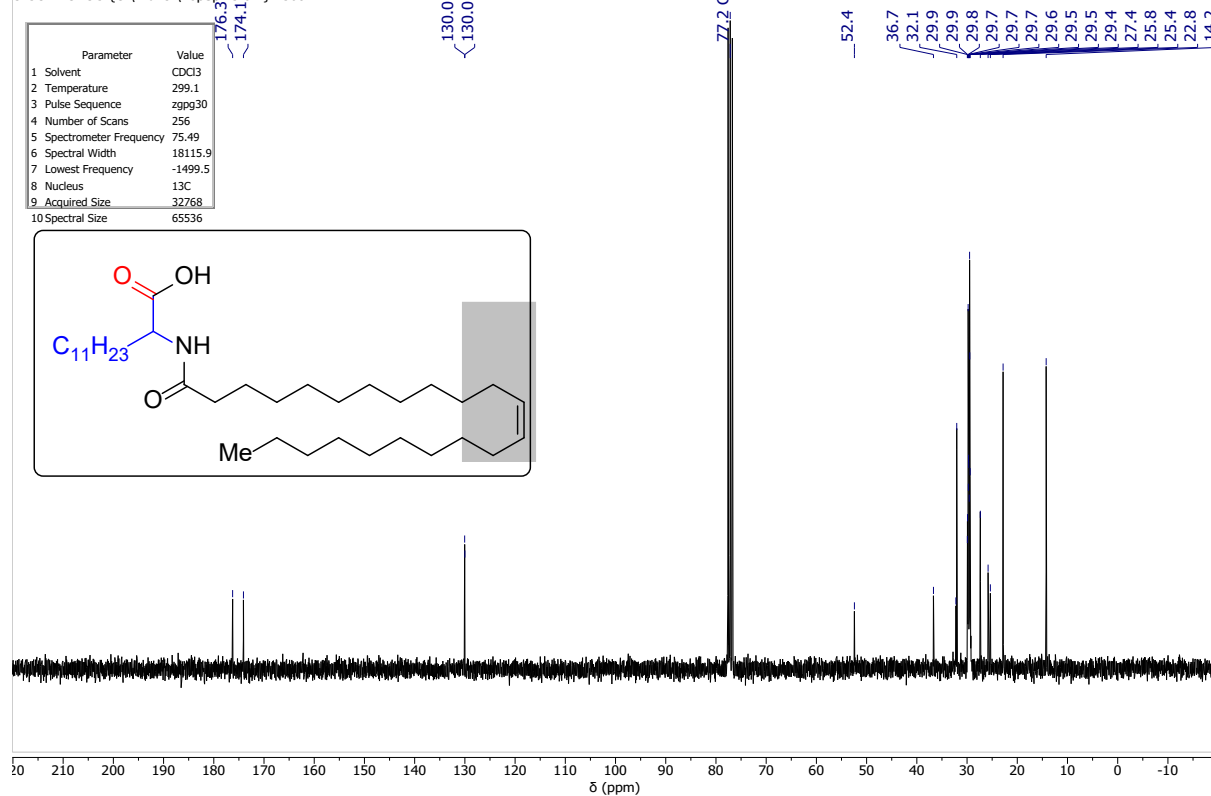

Figure S11:  $^{13}\text{C}$  NMR of compound (3e).

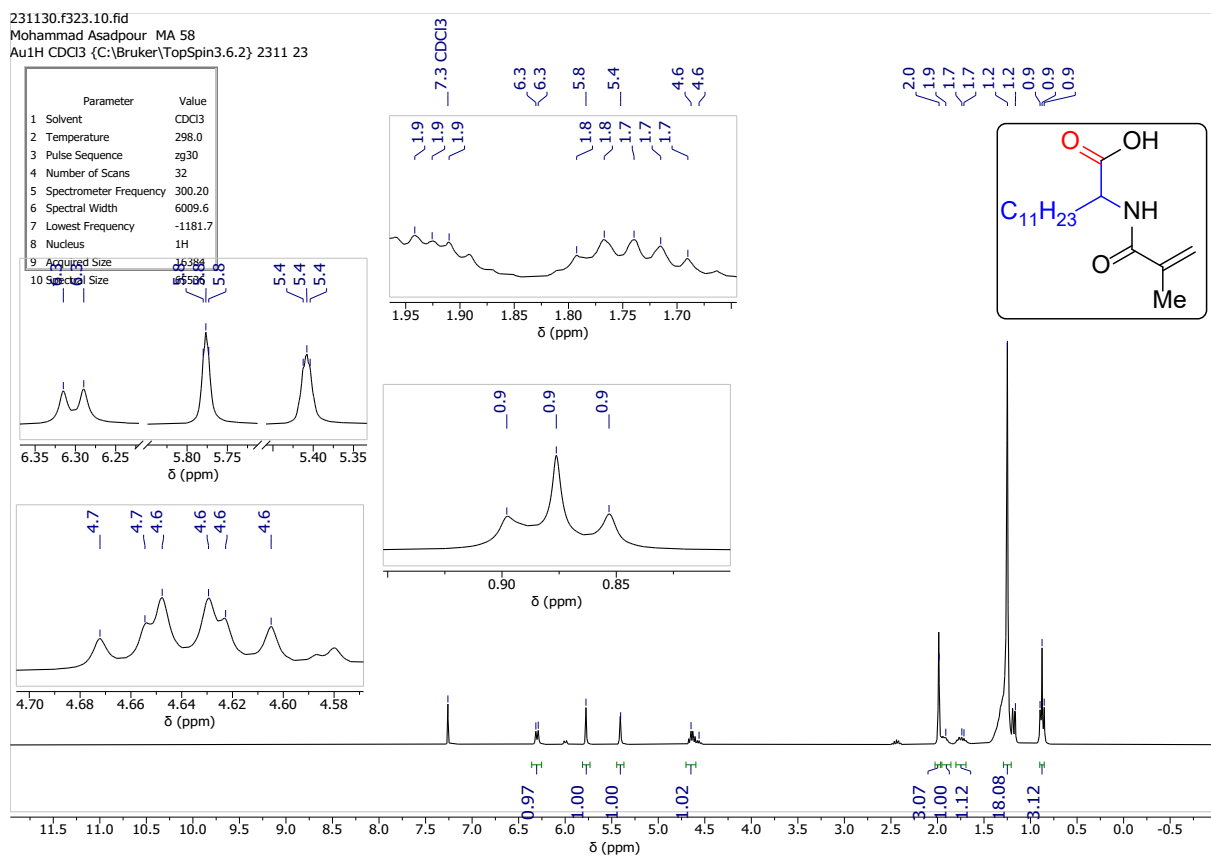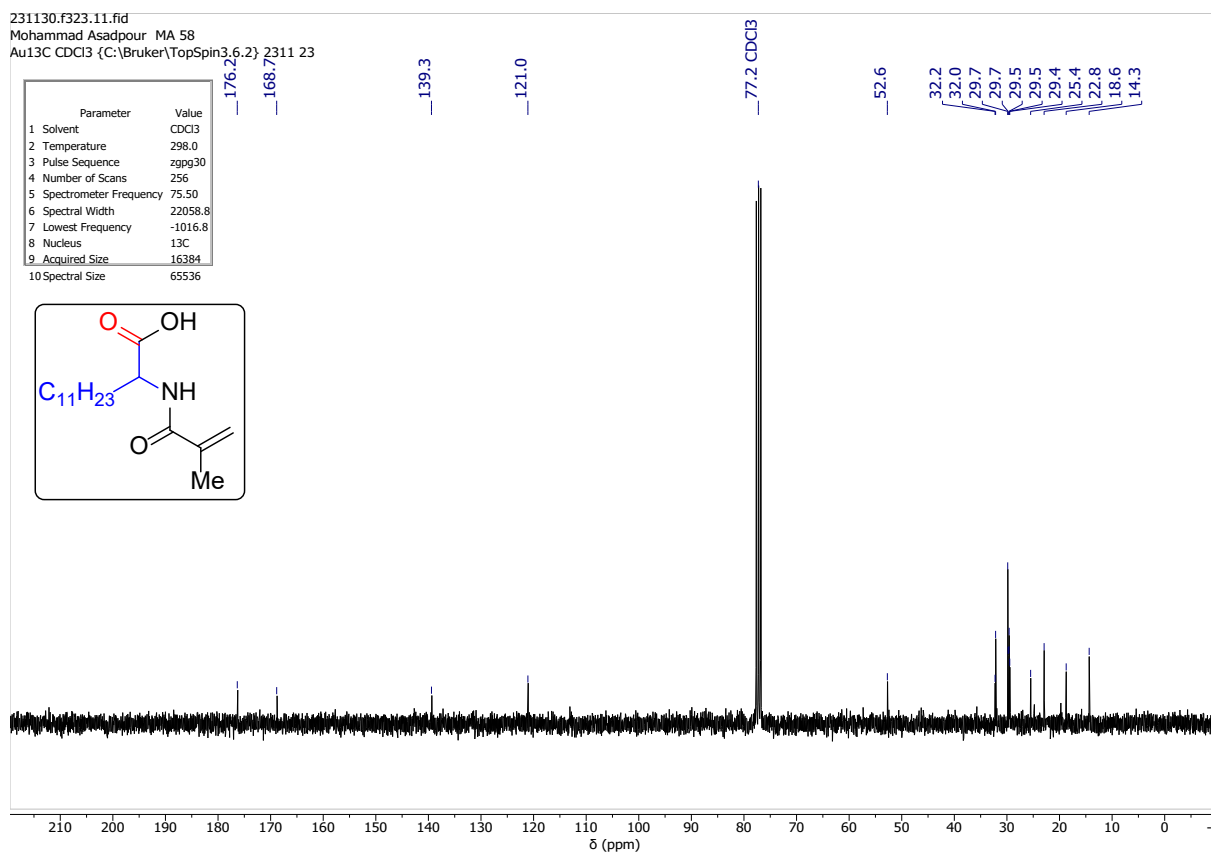



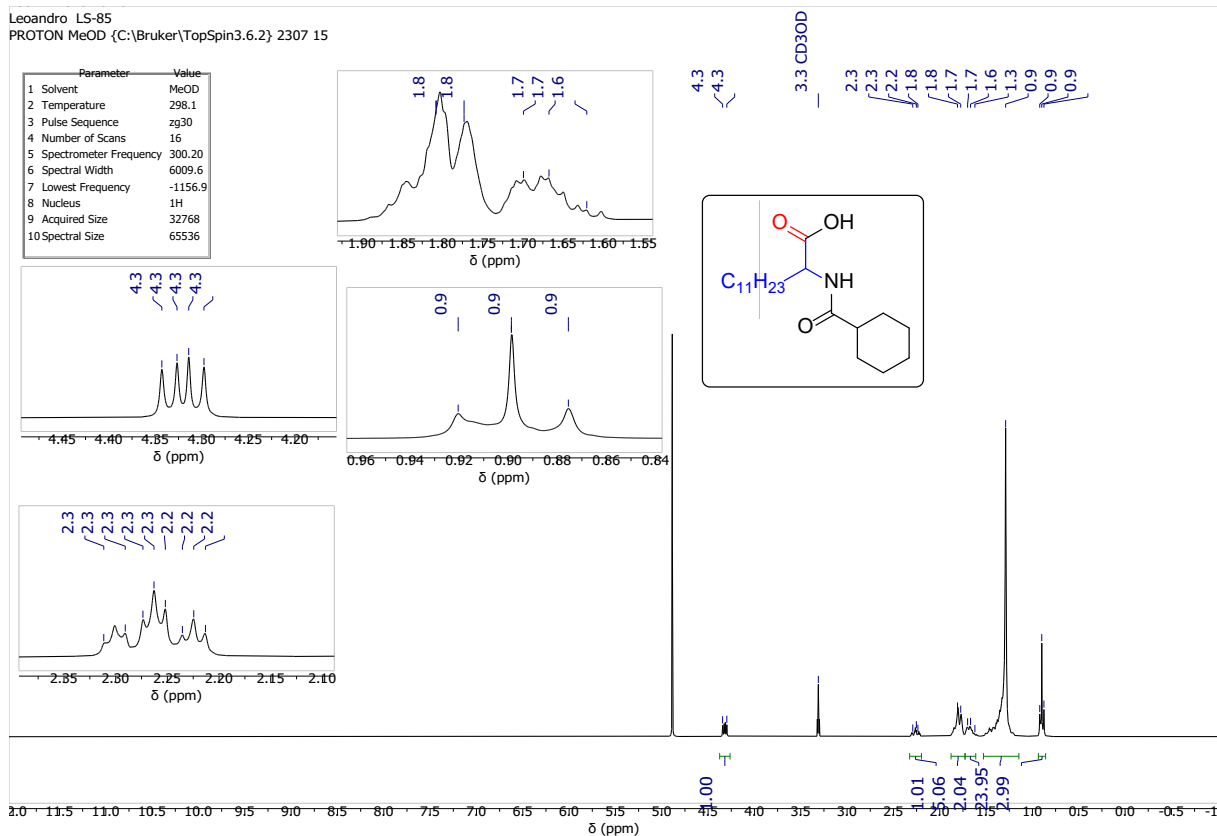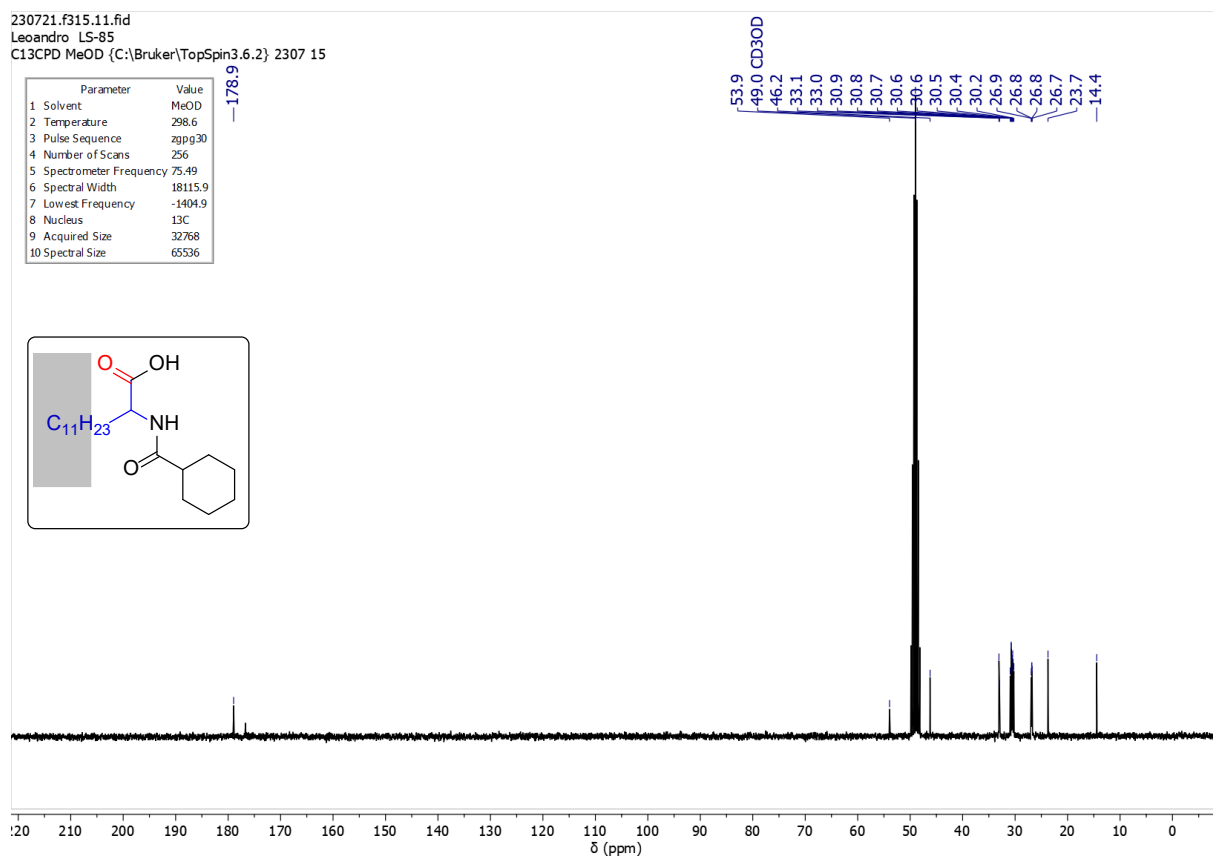



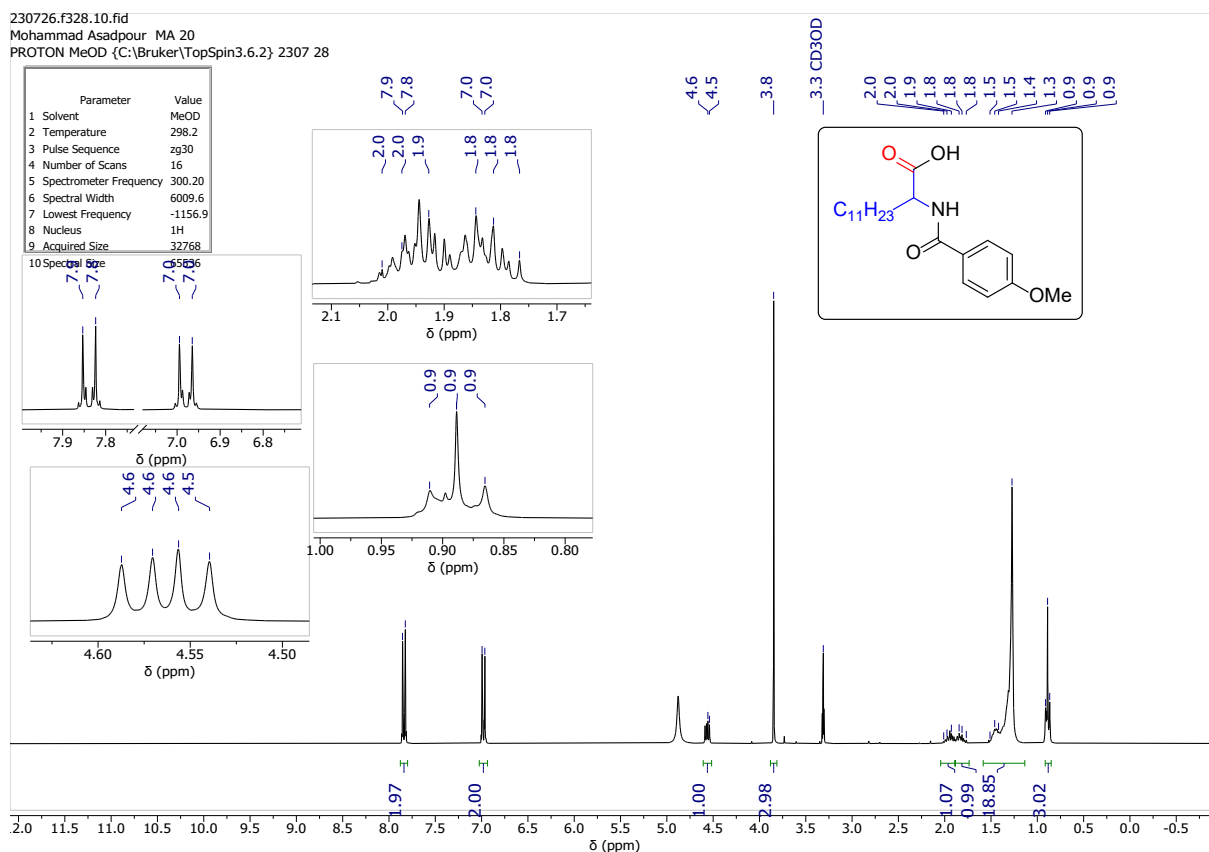

Figure S18: <sup>1</sup>H NMR of compound (3i).

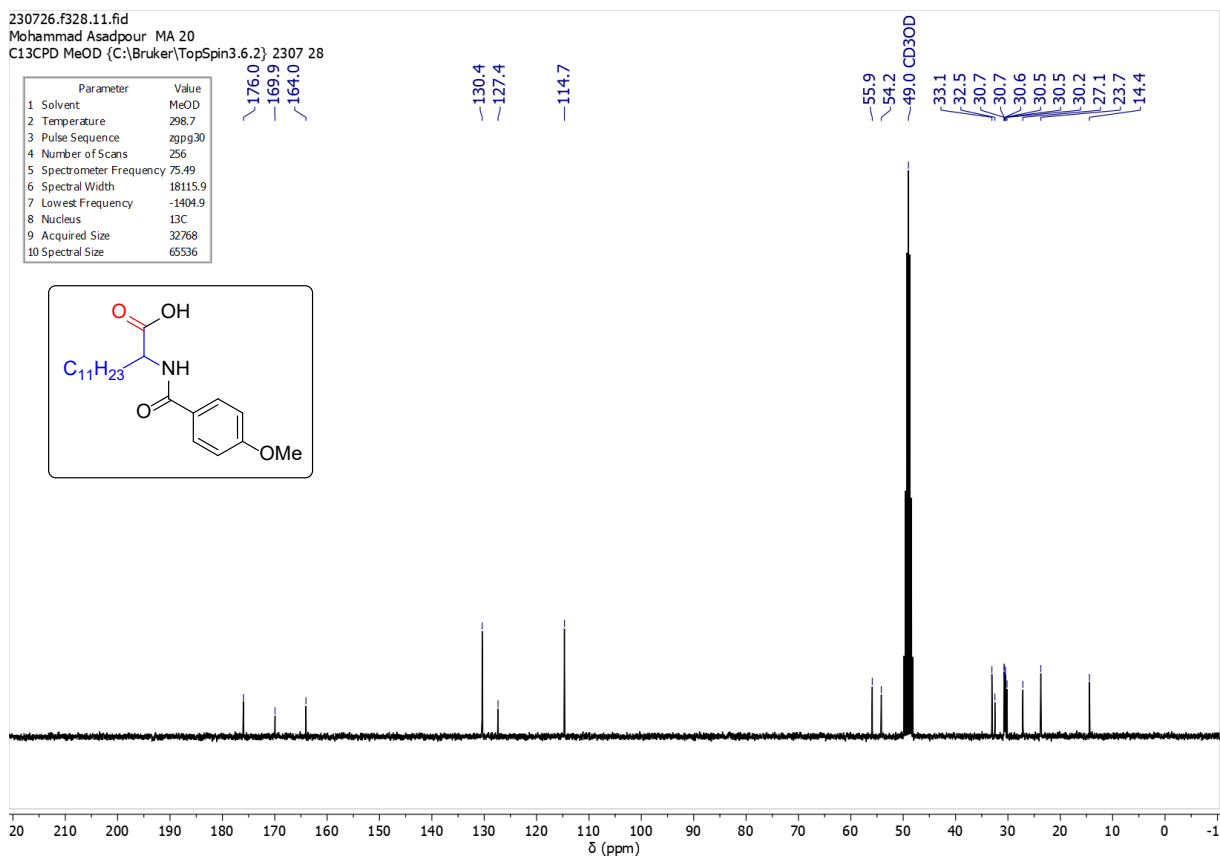

Figure S19: <sup>13</sup>C NMR of compound (3i).

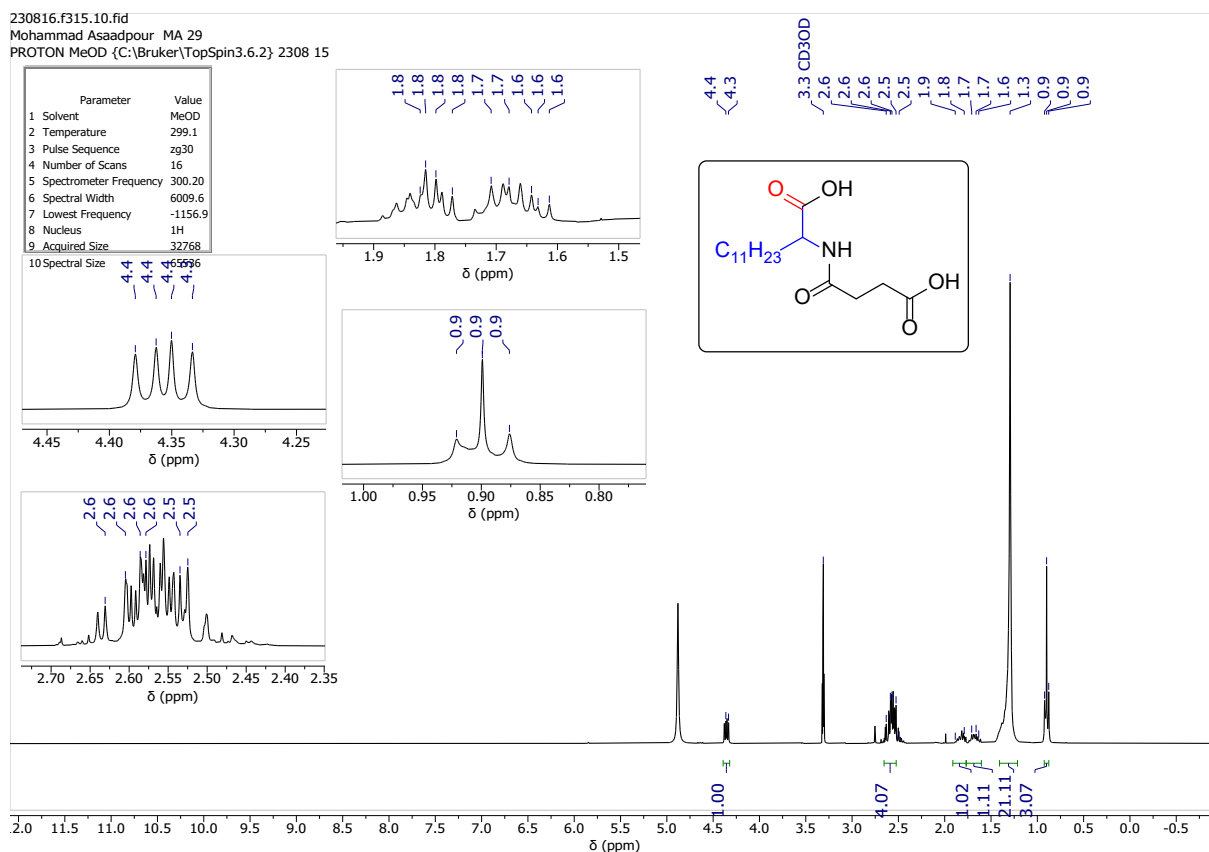

Figure S20: <sup>1</sup>H NMR of compound (3j).

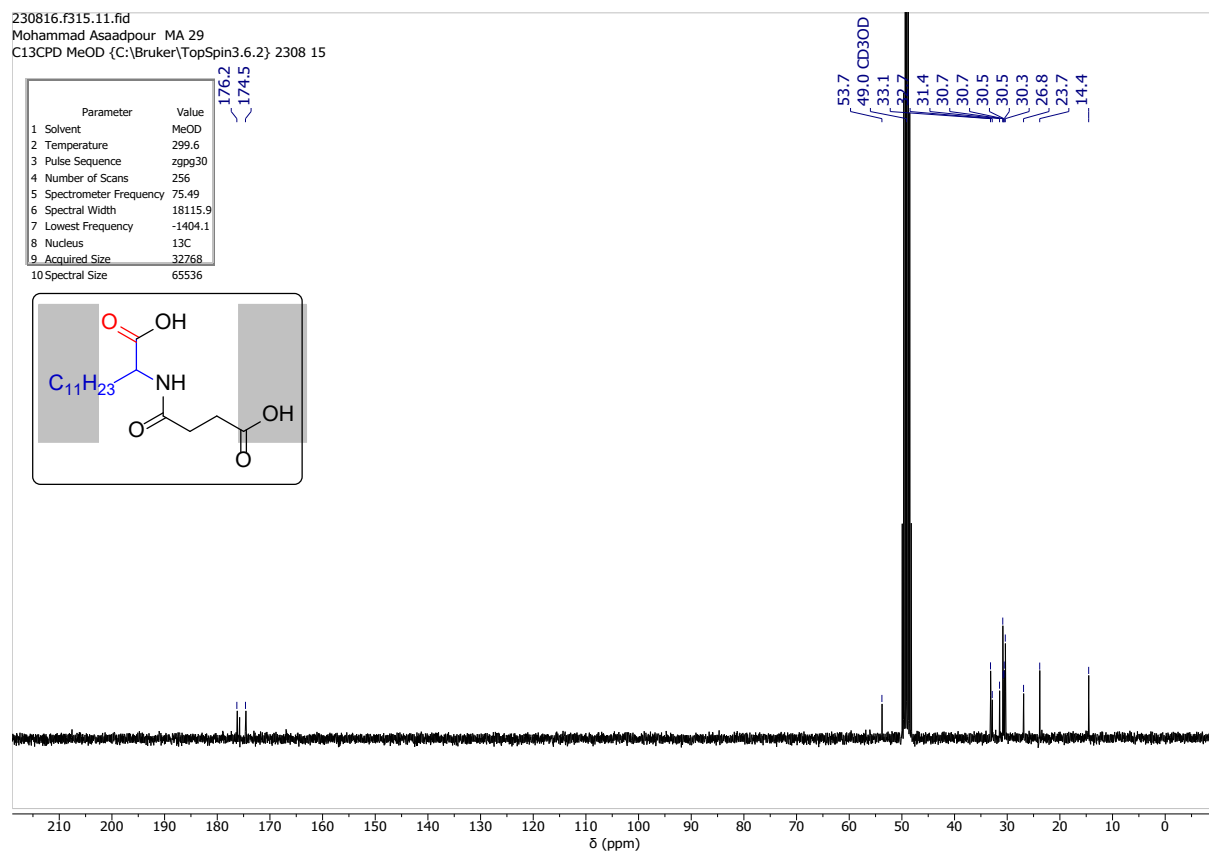

Figure S21: <sup>13</sup>C NMR of compound (3j).

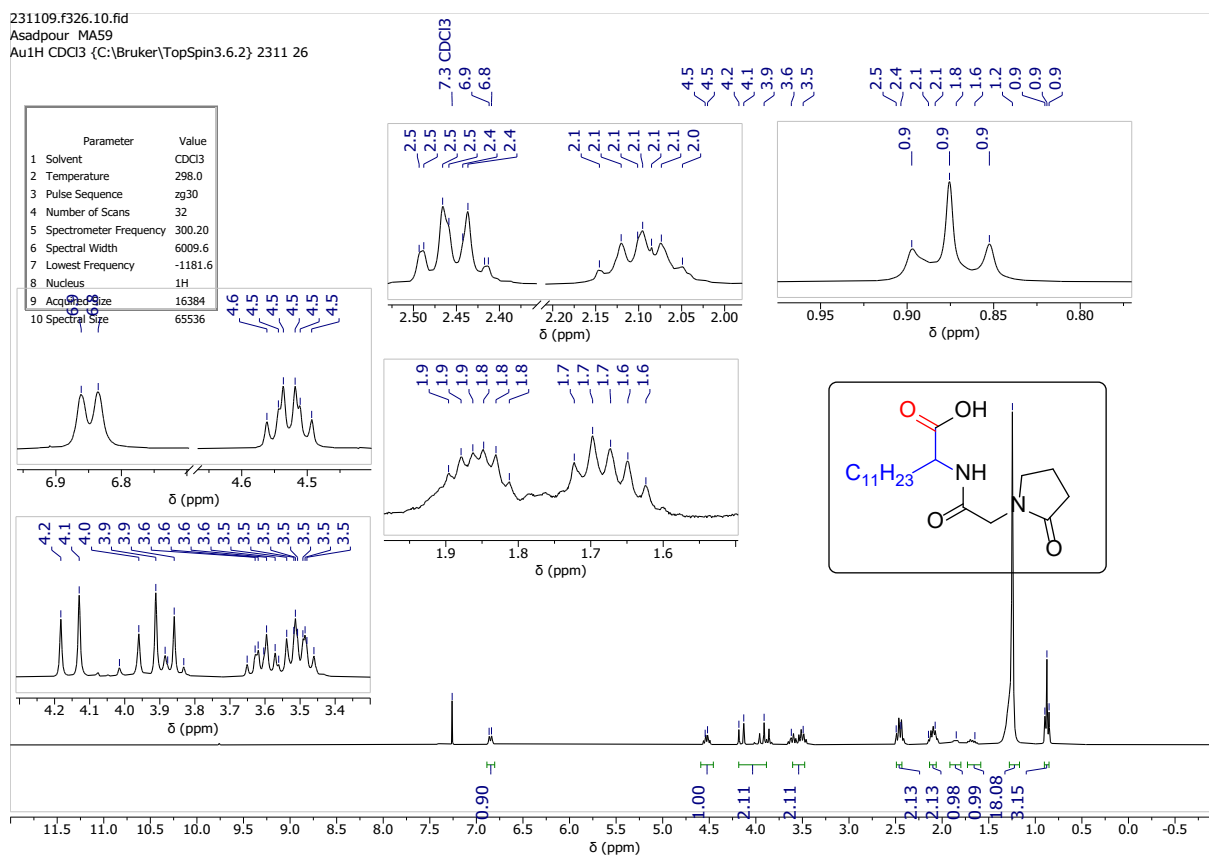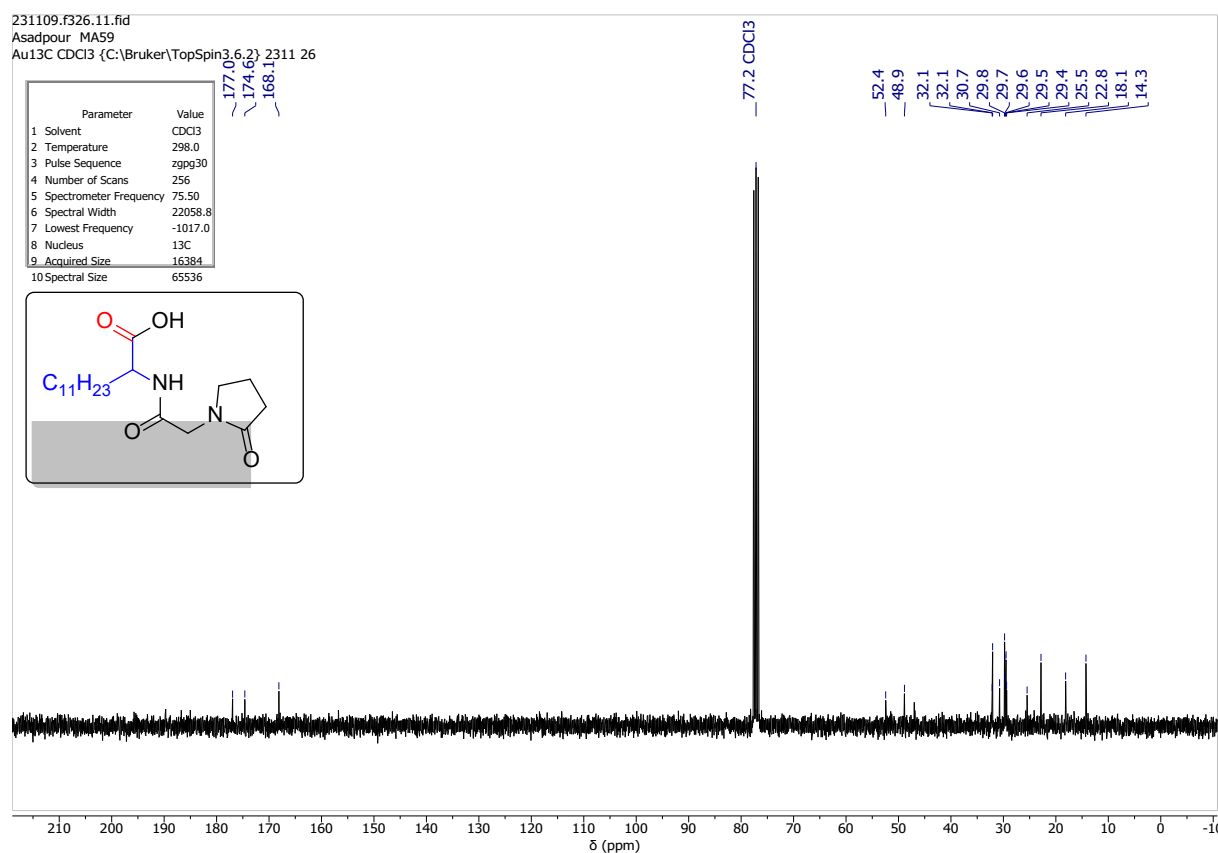

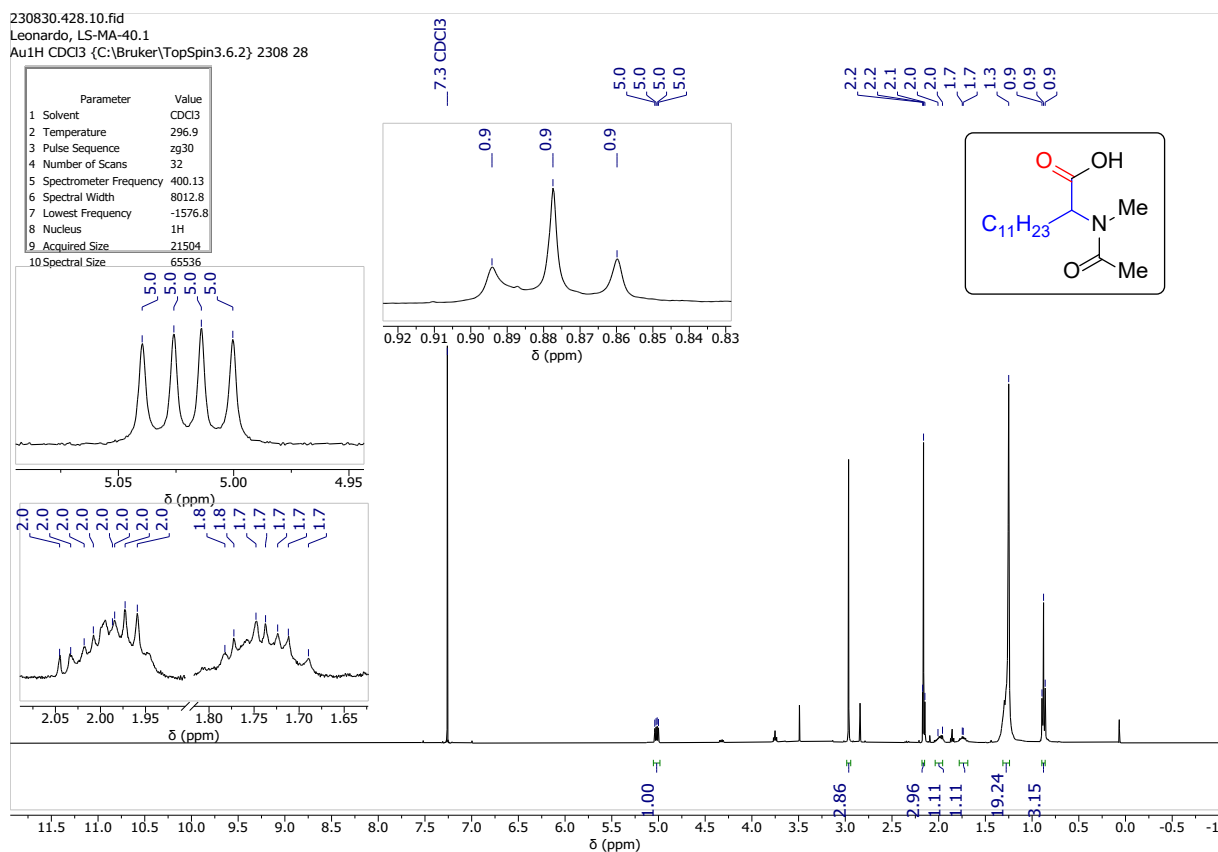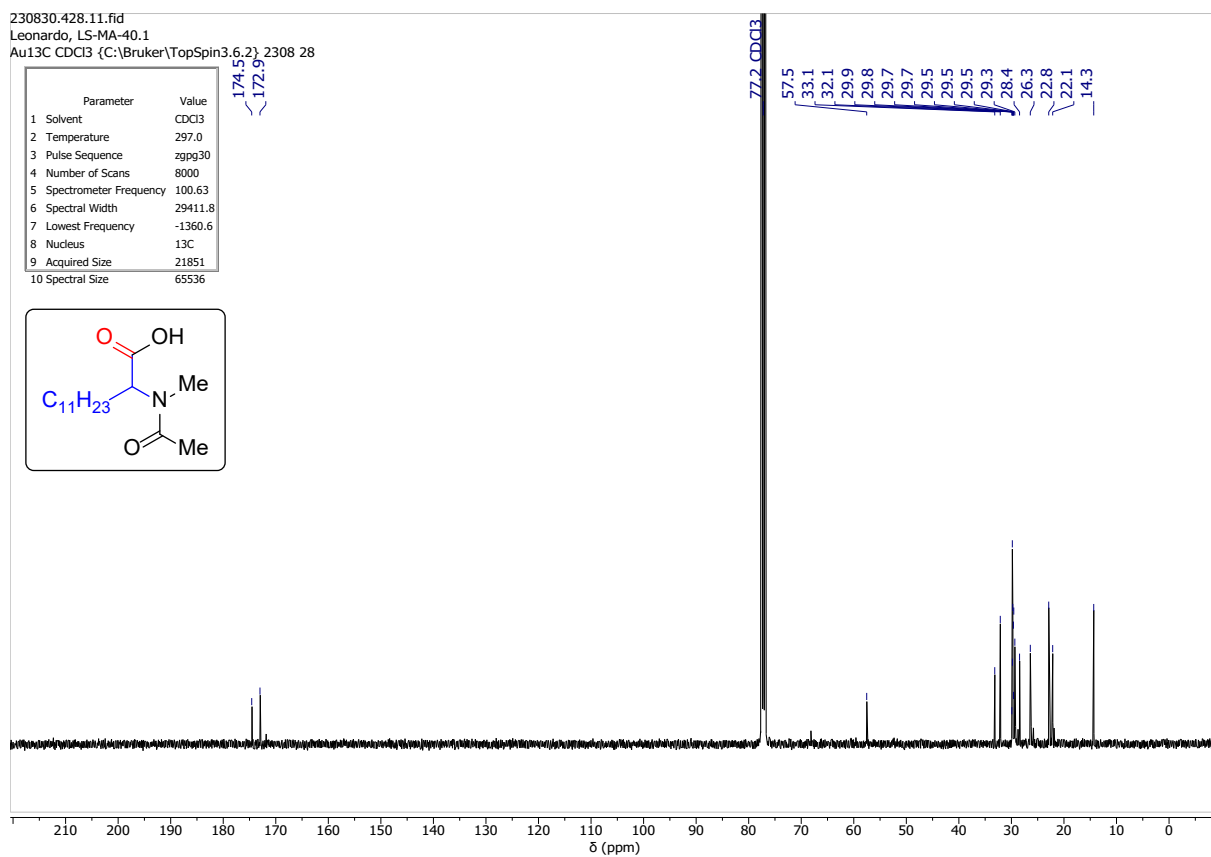

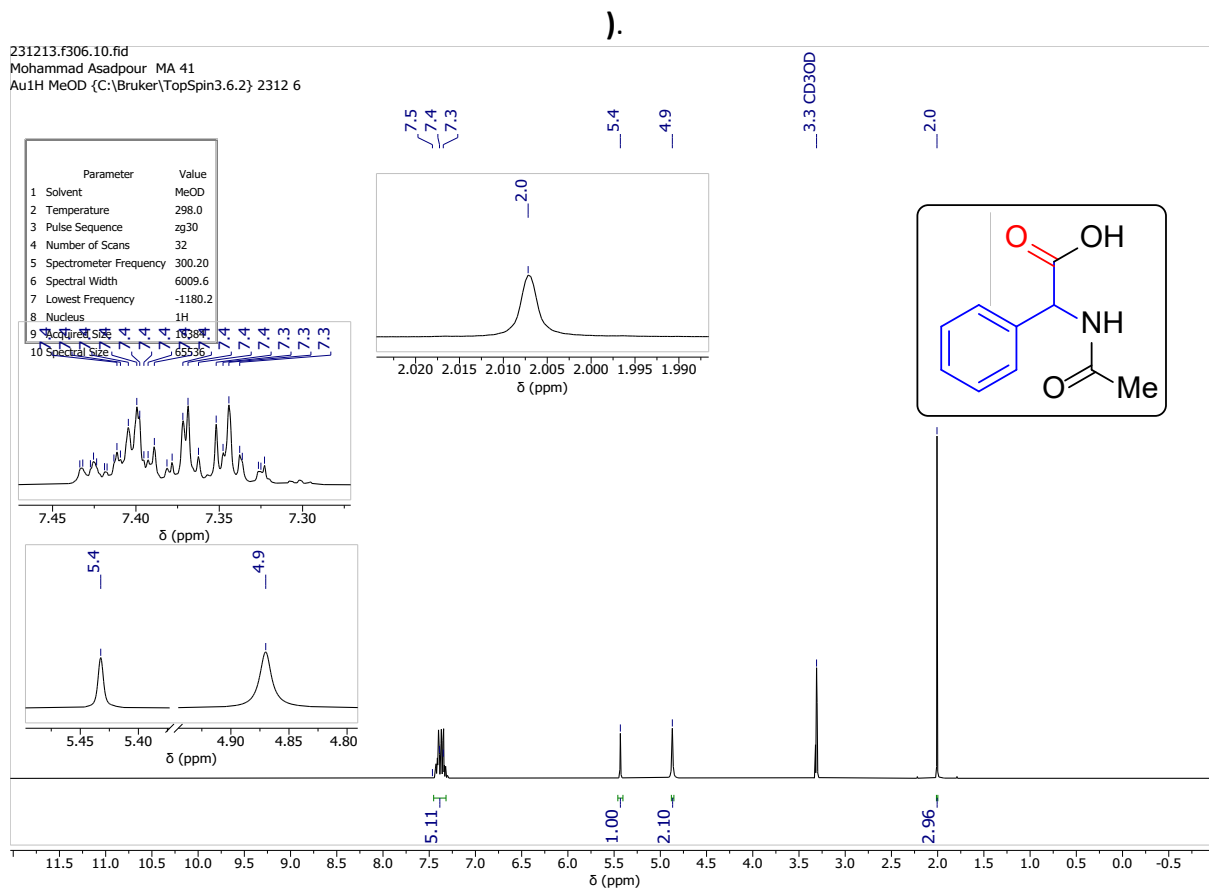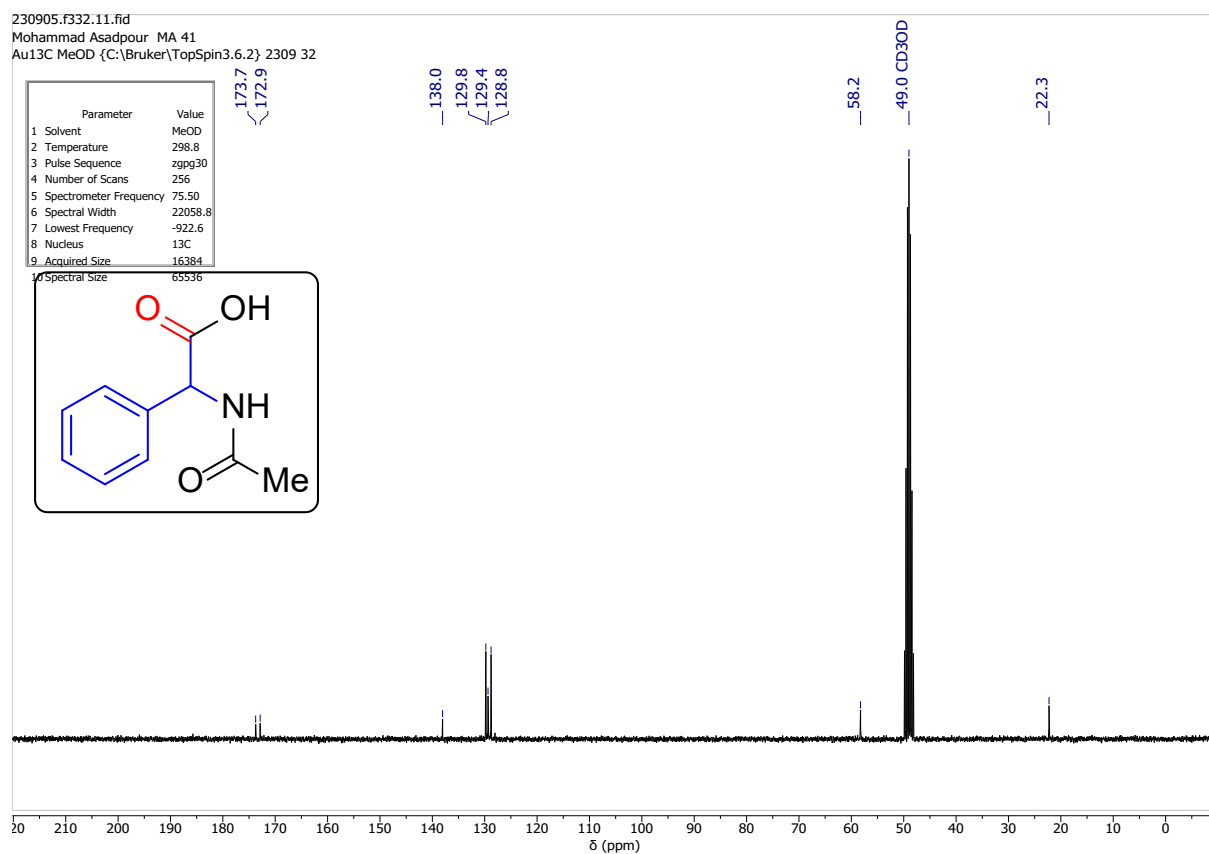

230906.f314.10.fid  
 Mohammad Asadpour MA 44  
 PROTON MeOD {C:\Bruker\TopSpin3.6.2} 2309 14

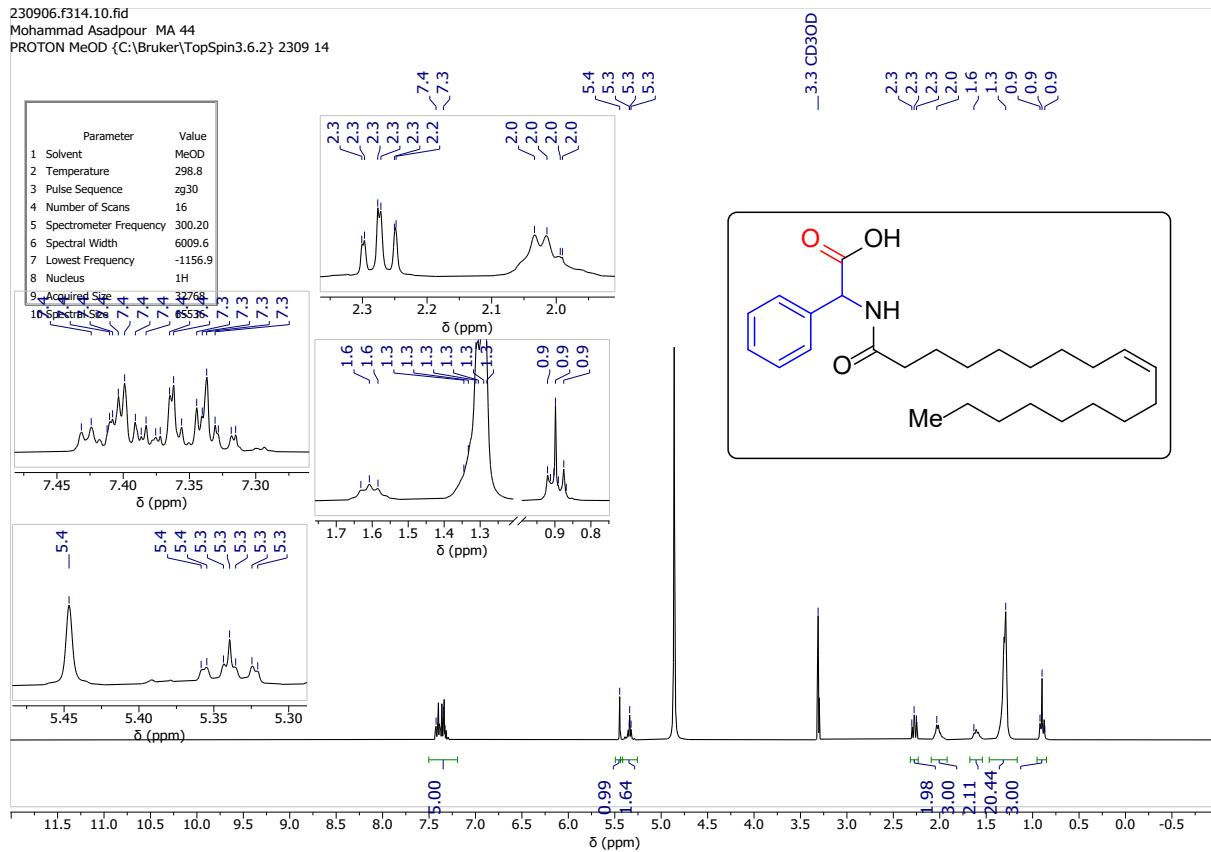

Figure S28: <sup>1</sup>H NMR of compound (3n).

230908.f321.10.fid  
 Mohammad Asadpour MA 44  
 Au13C MeOD {C:\Bruker\TopSpin3.6.2} 2309 21

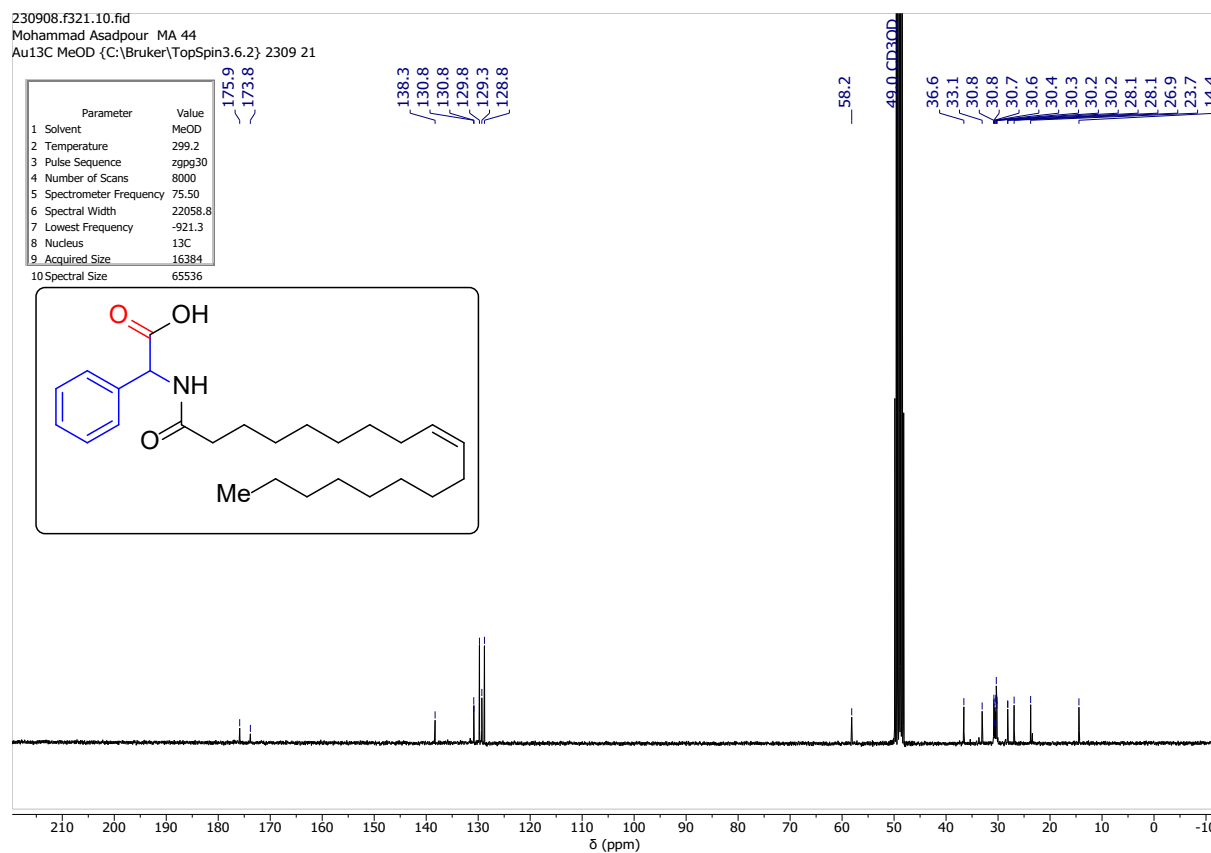

Figure S29: <sup>13</sup>C NMR of compound (3n).



230906.f313.10.fid  
 Mohammad Asadpour MA 42.1  
 PROTON MeOD {C:\Bruker\TopSpin3.6.2} 2309 13

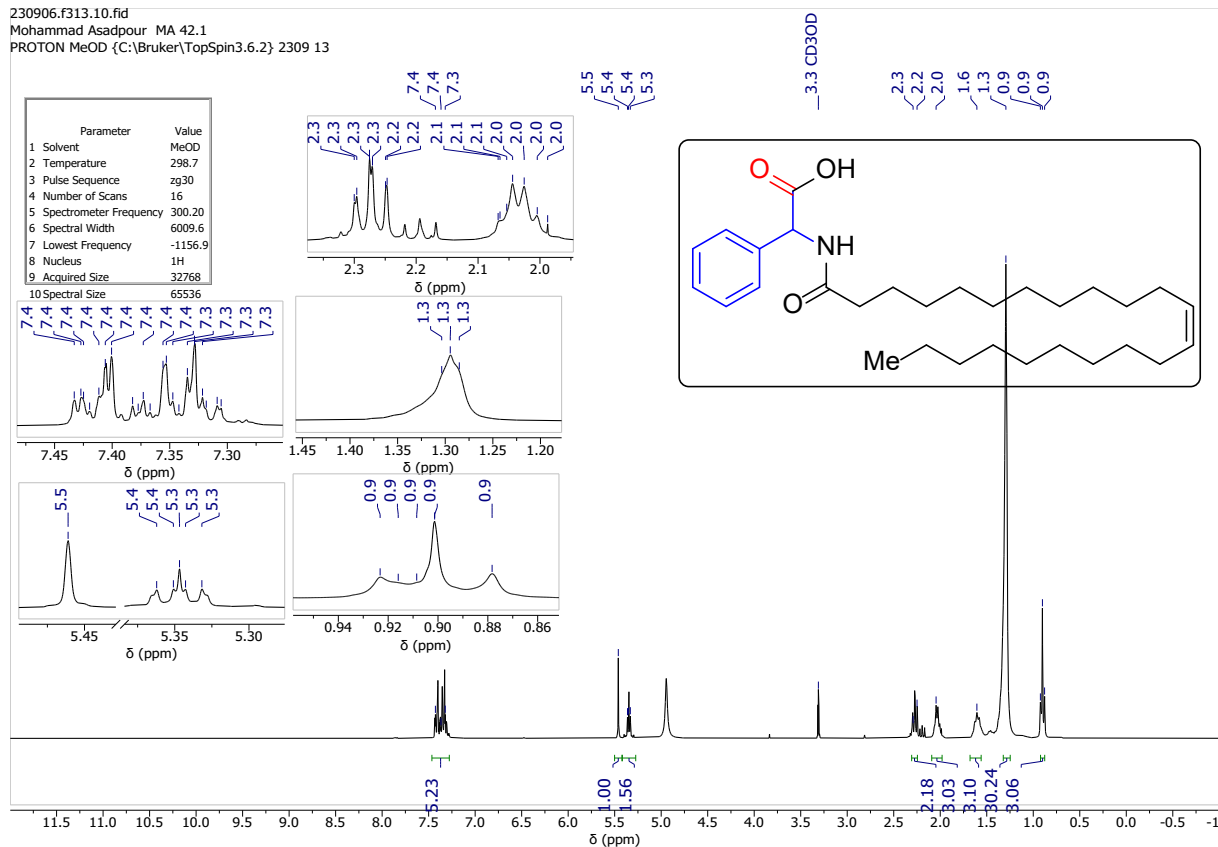

Figure S30: <sup>1</sup>H NMR of compound (3o).

230906.f313.11.fid  
 Mohammad Asadpour MA 42.1  
 Au13C MeOD {C:\Bruker\TopSpin3.6.2} 2309 13

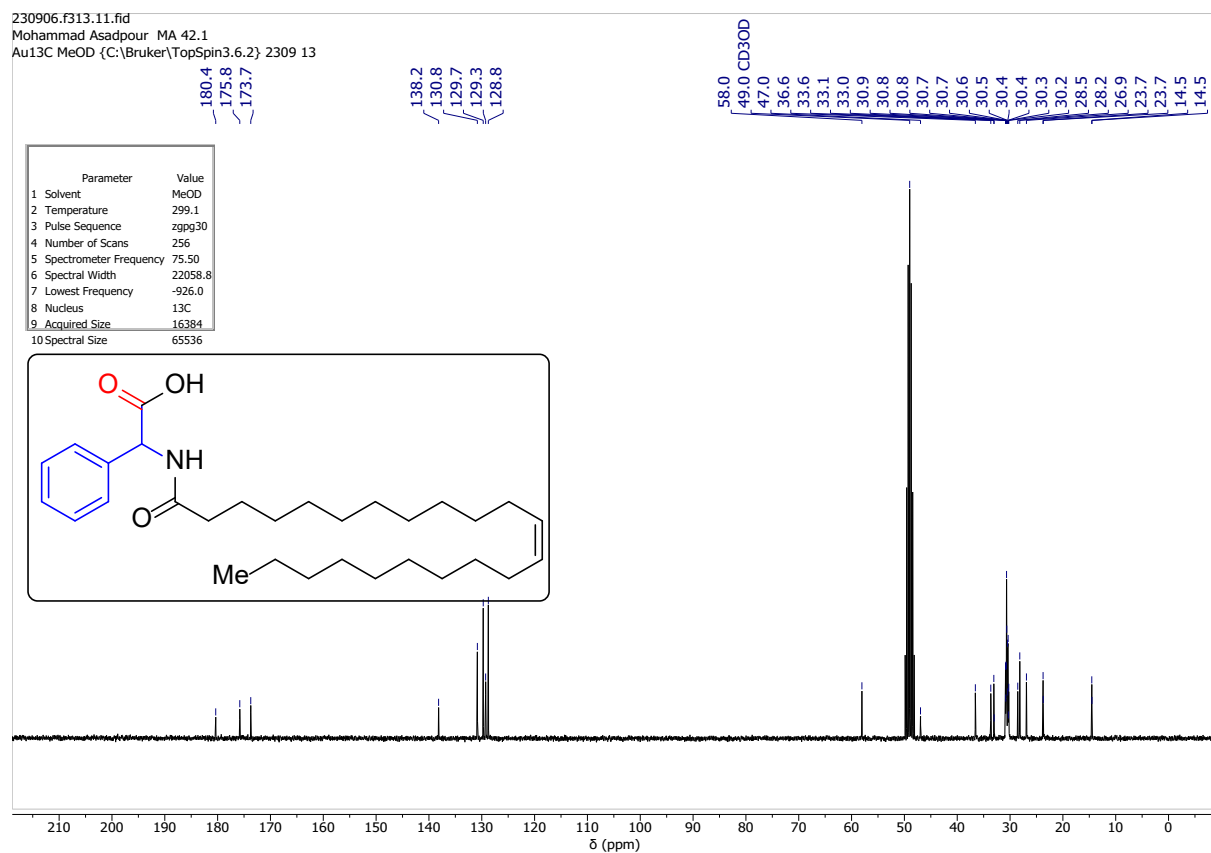

Figure S31: <sup>13</sup>C NMR of compound (3o).

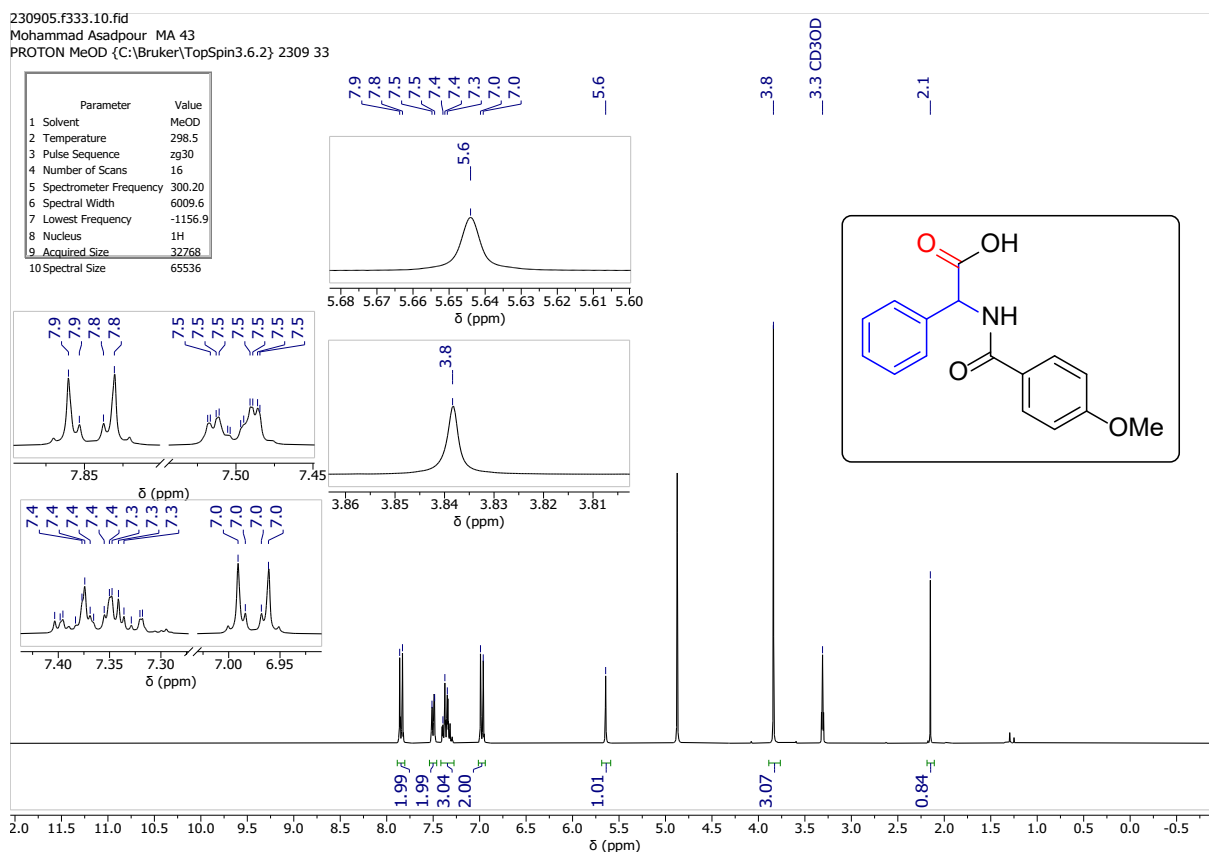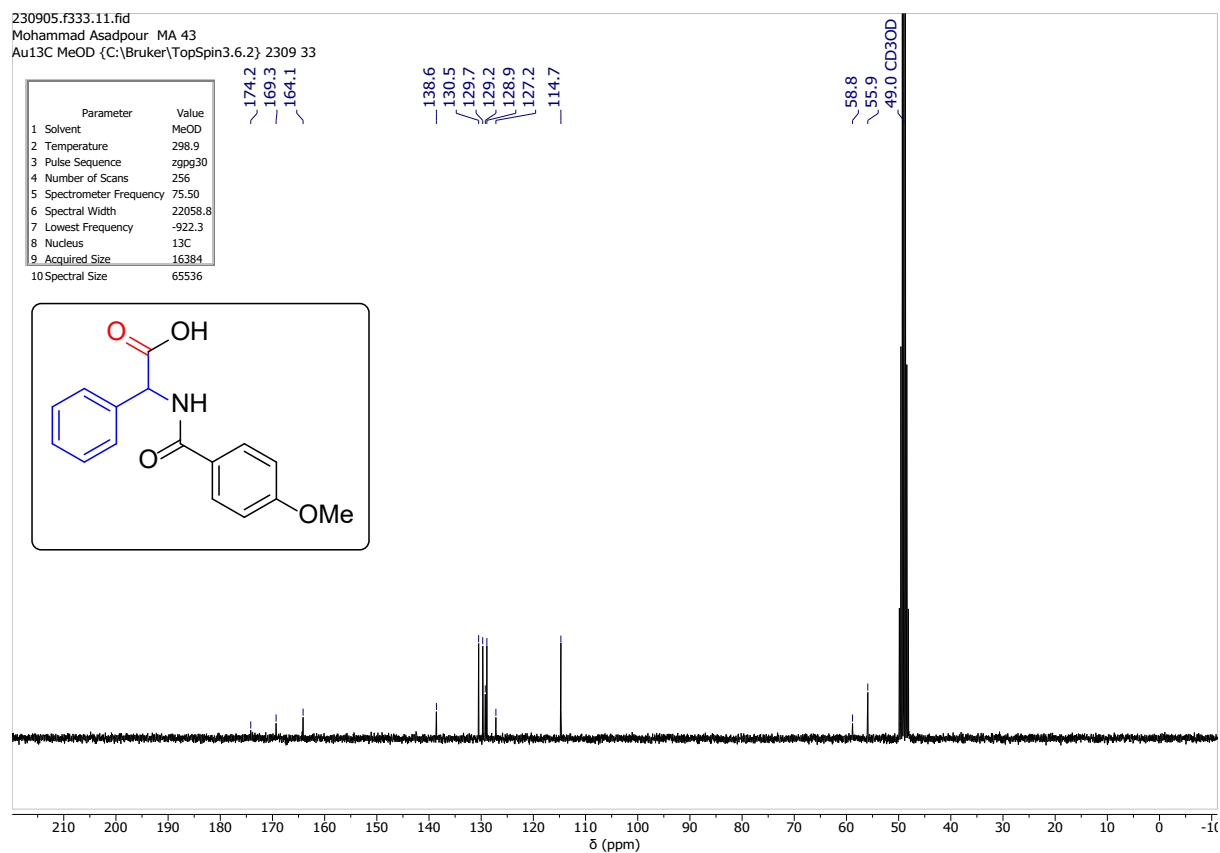

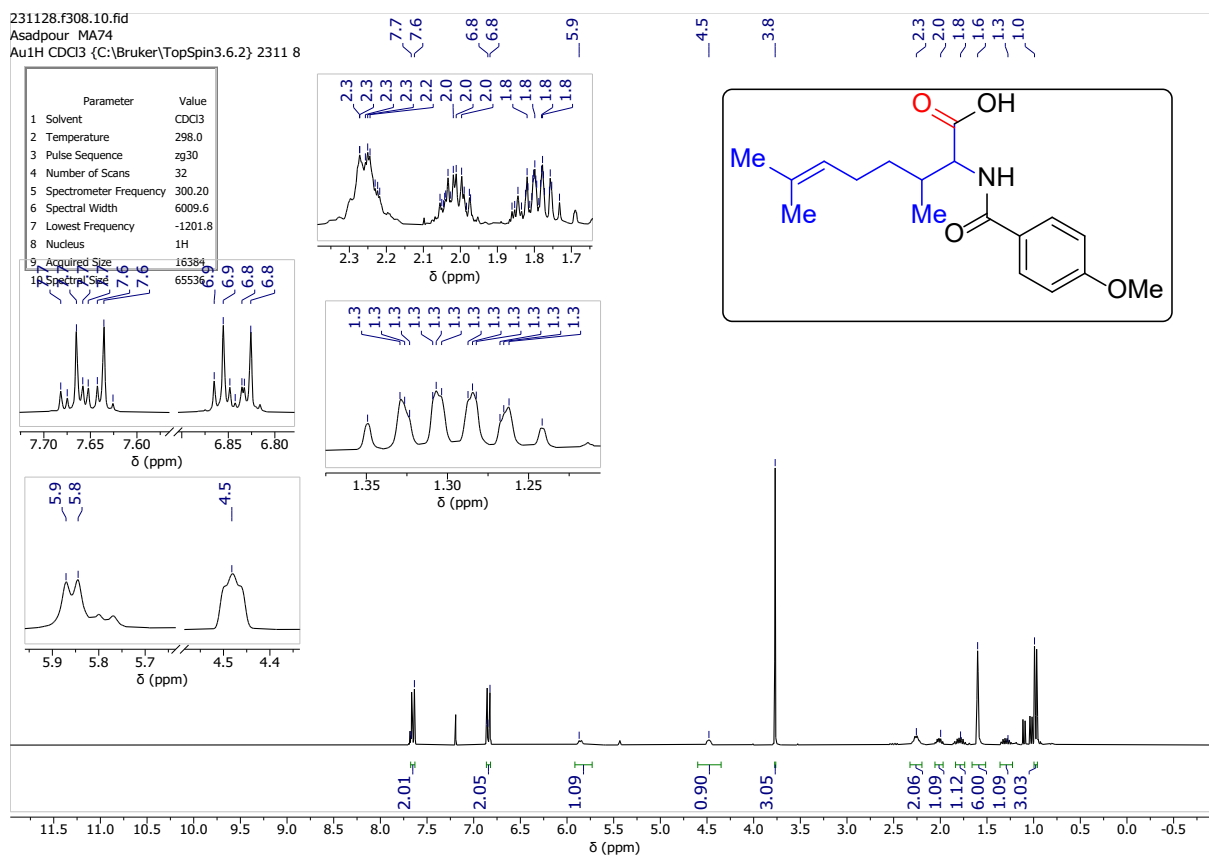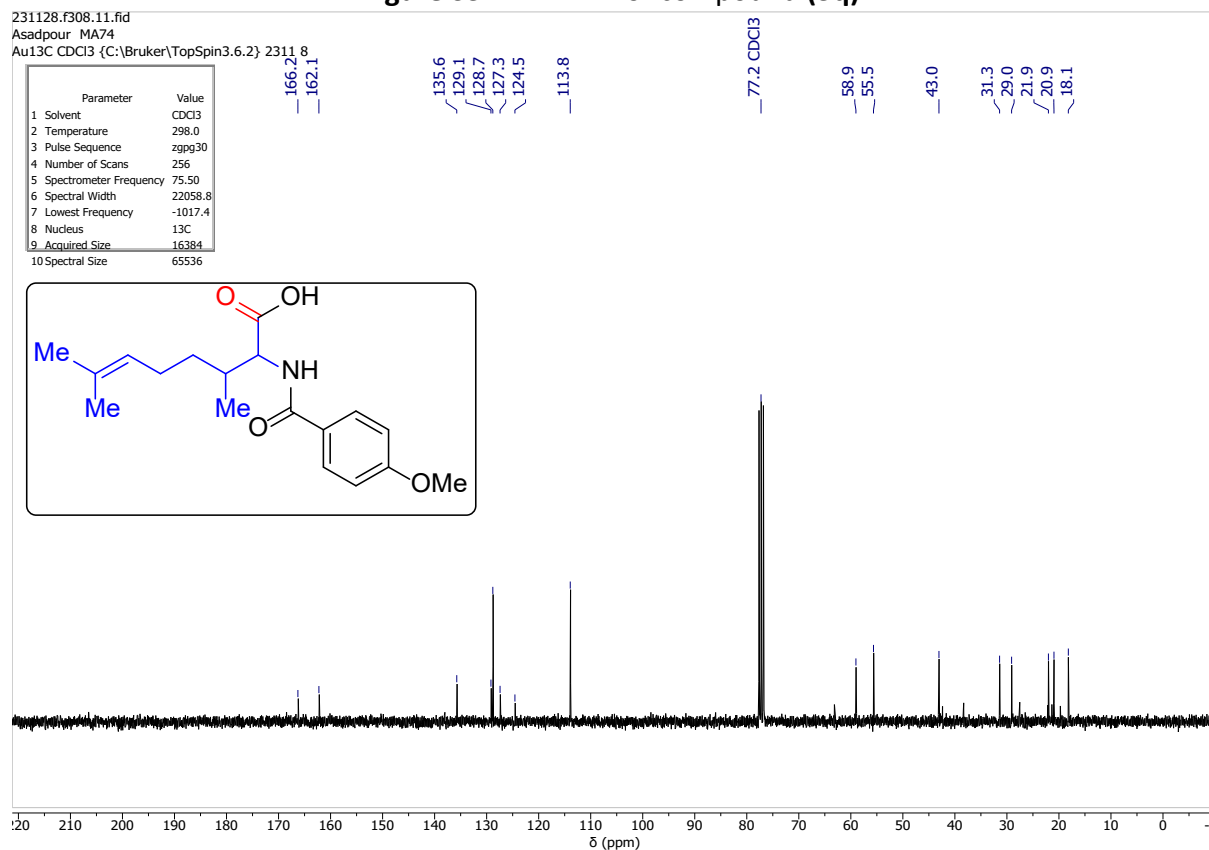

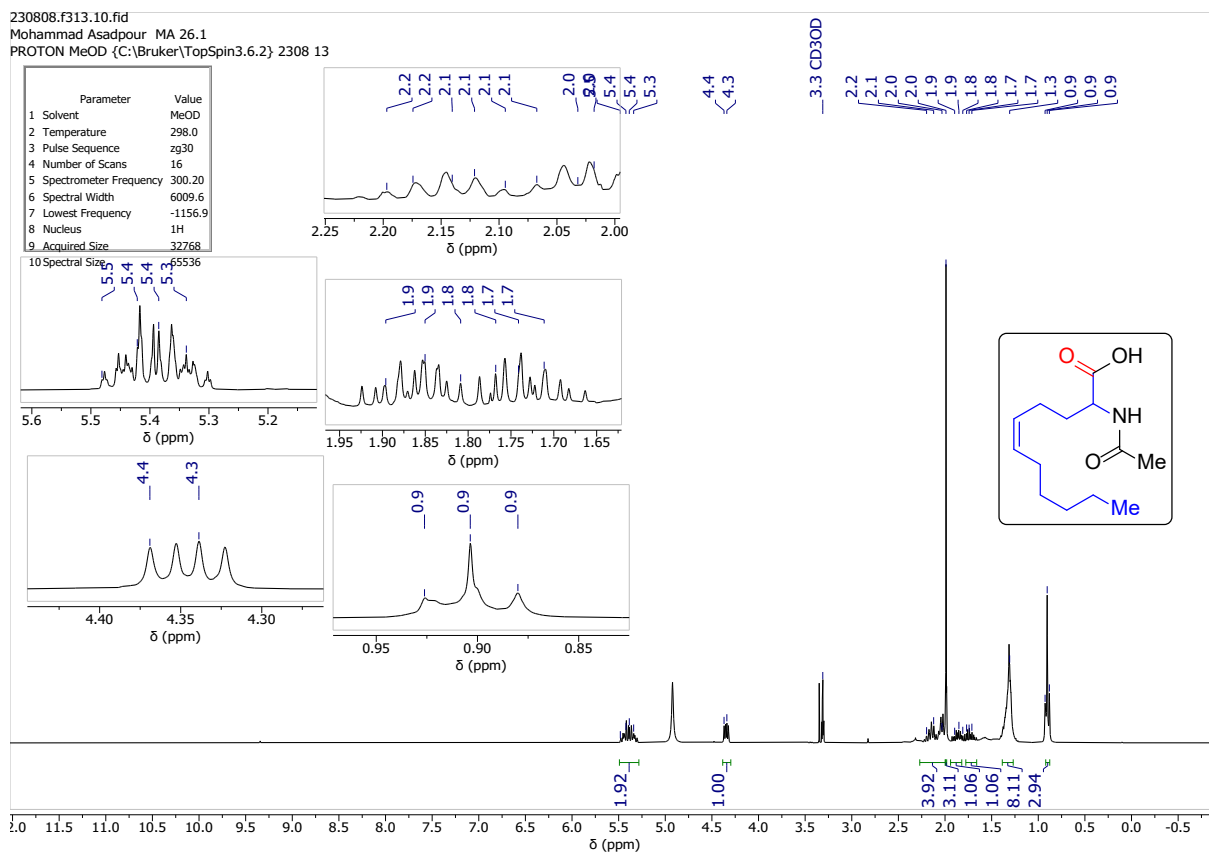

Figure S36: <sup>1</sup>H NMR of compound (3r).

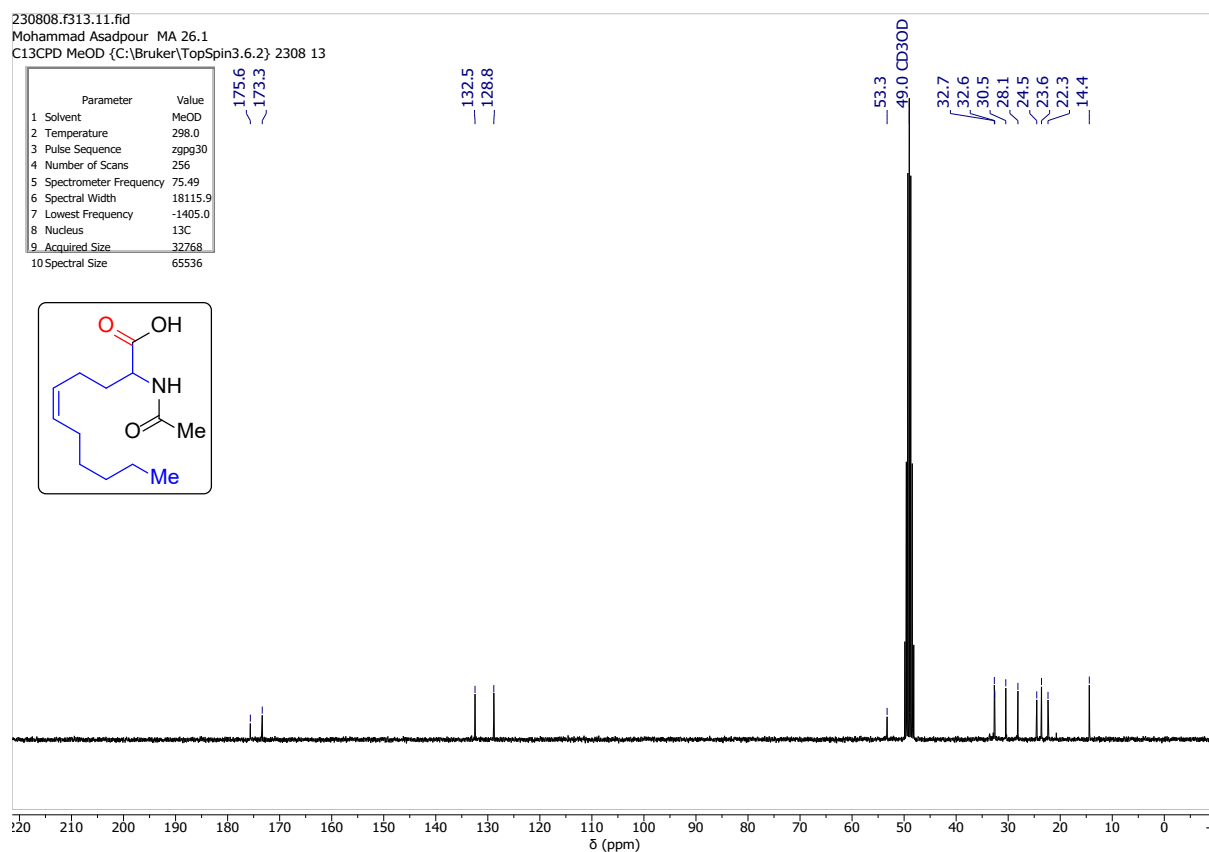

Figure S37: <sup>13</sup>C NMR of compound (3r).

230914.452.10.fid  
 Mohammad Asadpour MA 46  
 Au1H MeOD {C:\Bruker\TopSpin3.6.2} 2309 52

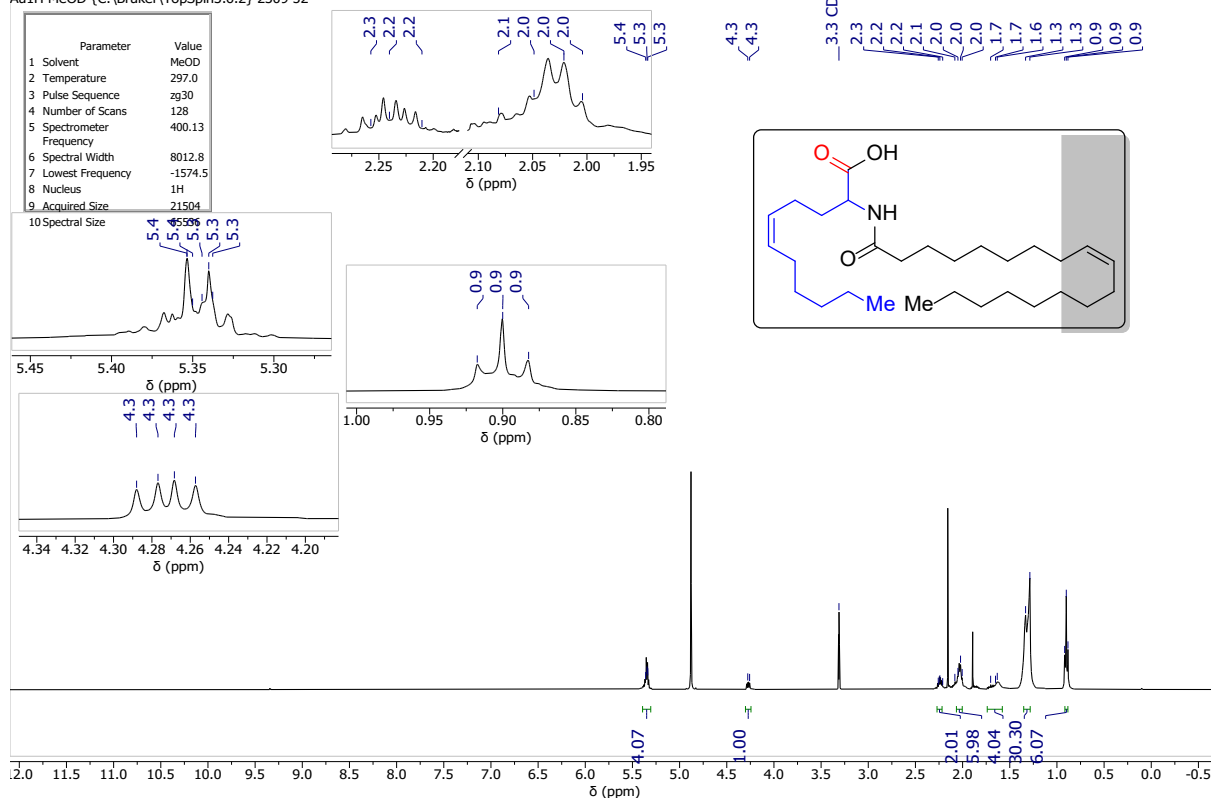

230913.f319.11.fid  
 Mohammad Asadpour MA 46  
 Au13C MeOD {C:\Bruker\TopSpin3.6.2} 2309 19

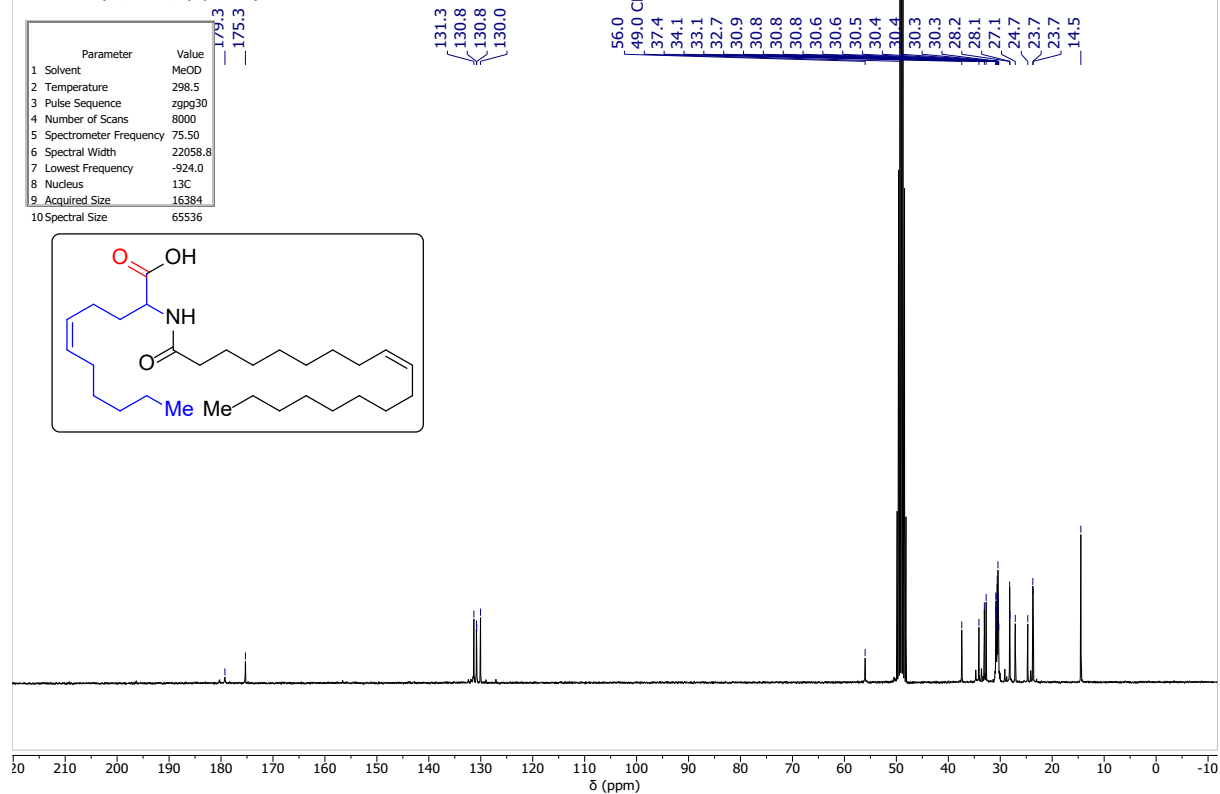

230808.f332.10.fid  
 Mohammad Asadpour MA 28.1  
 PROTON MeOD {C:\Bruker\TopSpin3.6.2} 2308 32

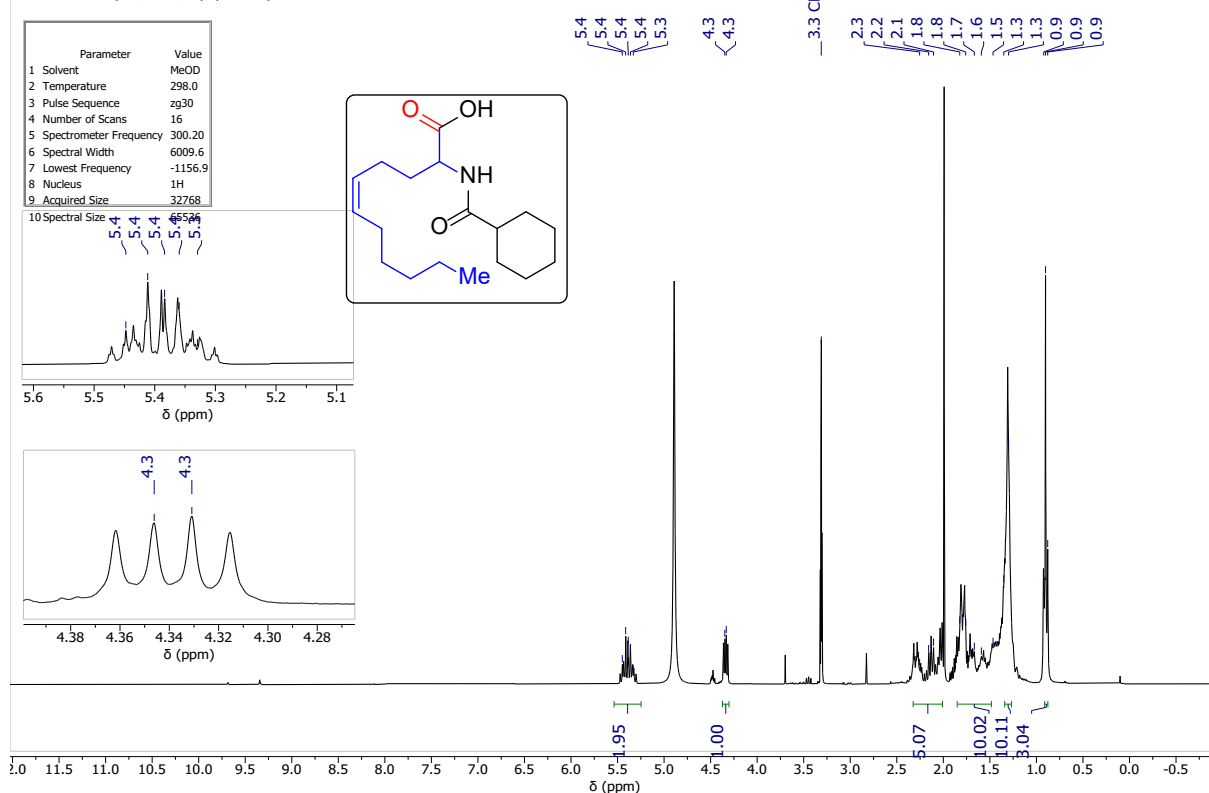

Figure S40: <sup>1</sup>H NMR of compound (3t).

230808.f332.11.fid  
 Mohammad Asadpour MA 28.1  
 C13CPD MeOD {C:\Bruker\TopSpin3.6.2} 2308 32

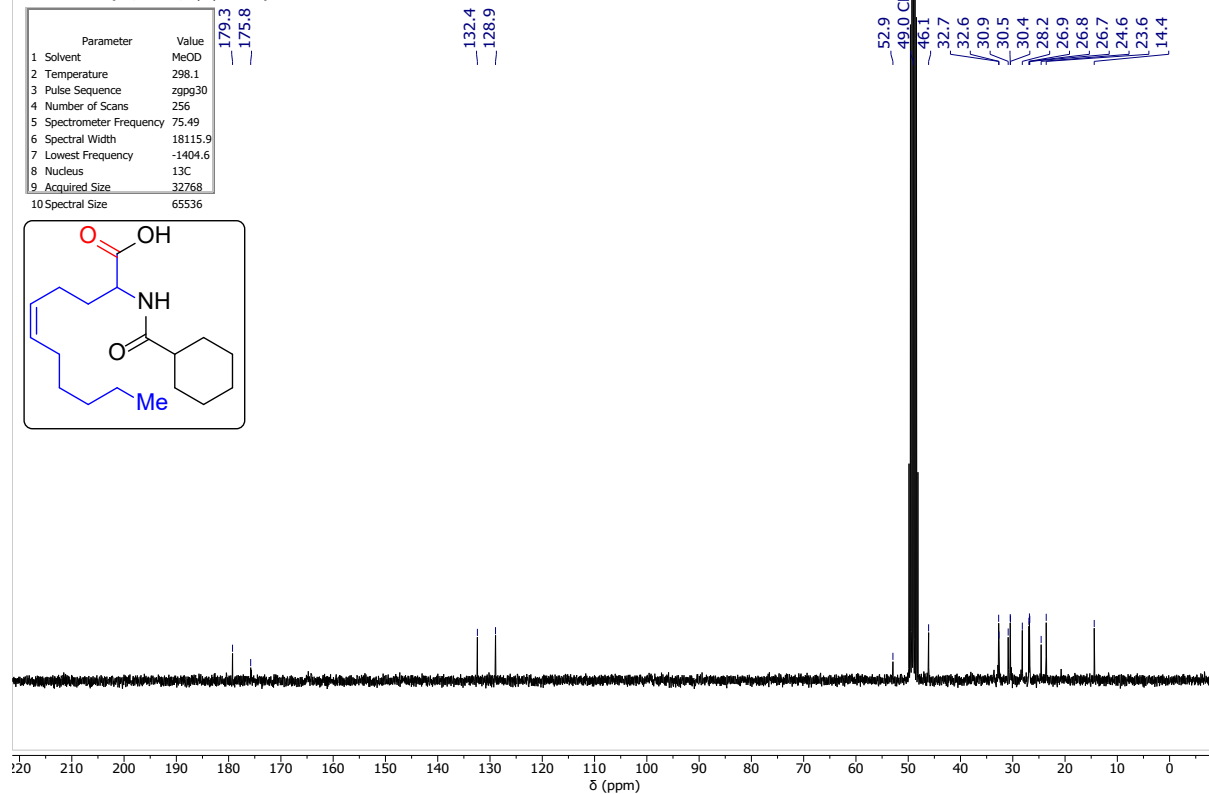

Figure S41: <sup>13</sup>C NMR of compound (3t).

230808.326.10.fid  
 Mohammad Asadpour, MA 27.1  
 Au1H MeOD {C:\Bruker\TopSpin3.6.2} 2308 26

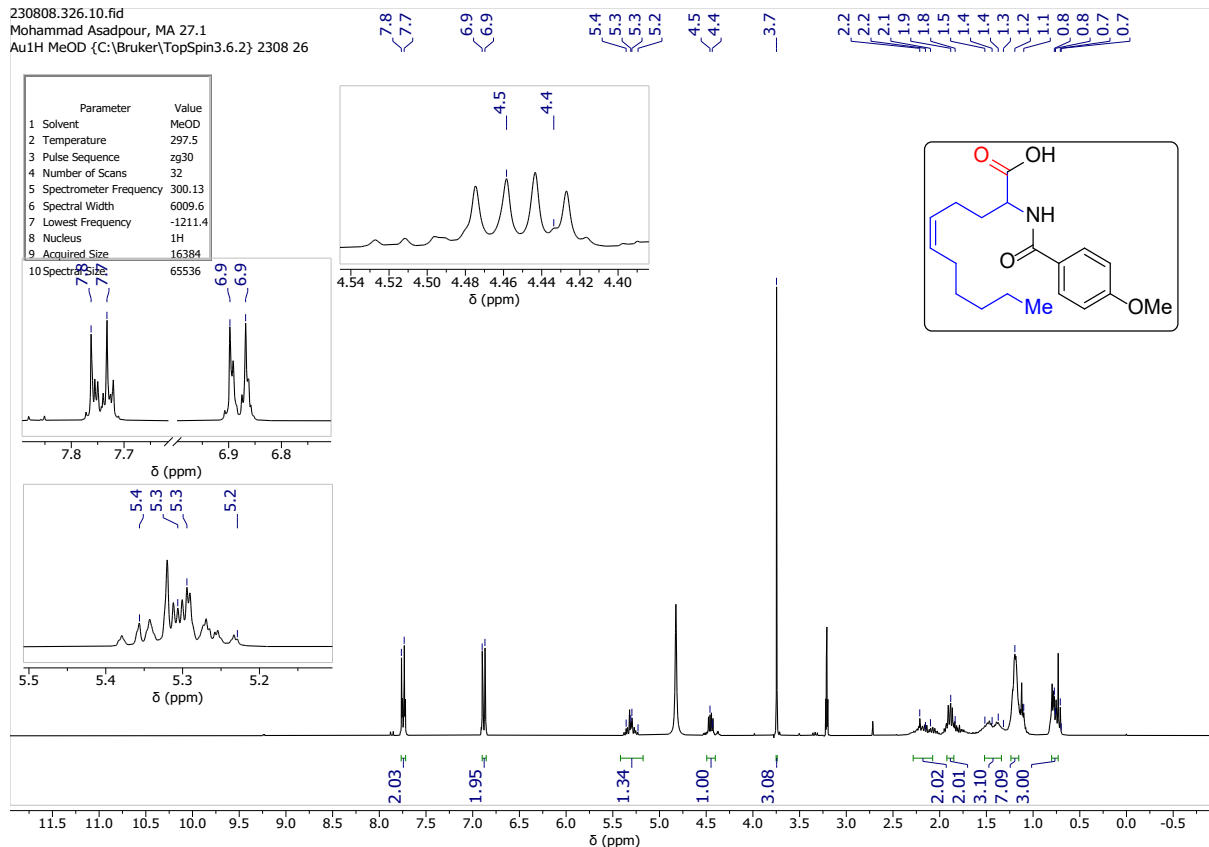

230808.326.11.fid  
 Mohammad Asadpour, MA 27.1  
 Au13C MeOD {C:\Bruker\TopSpin3.6.2} 2308 26

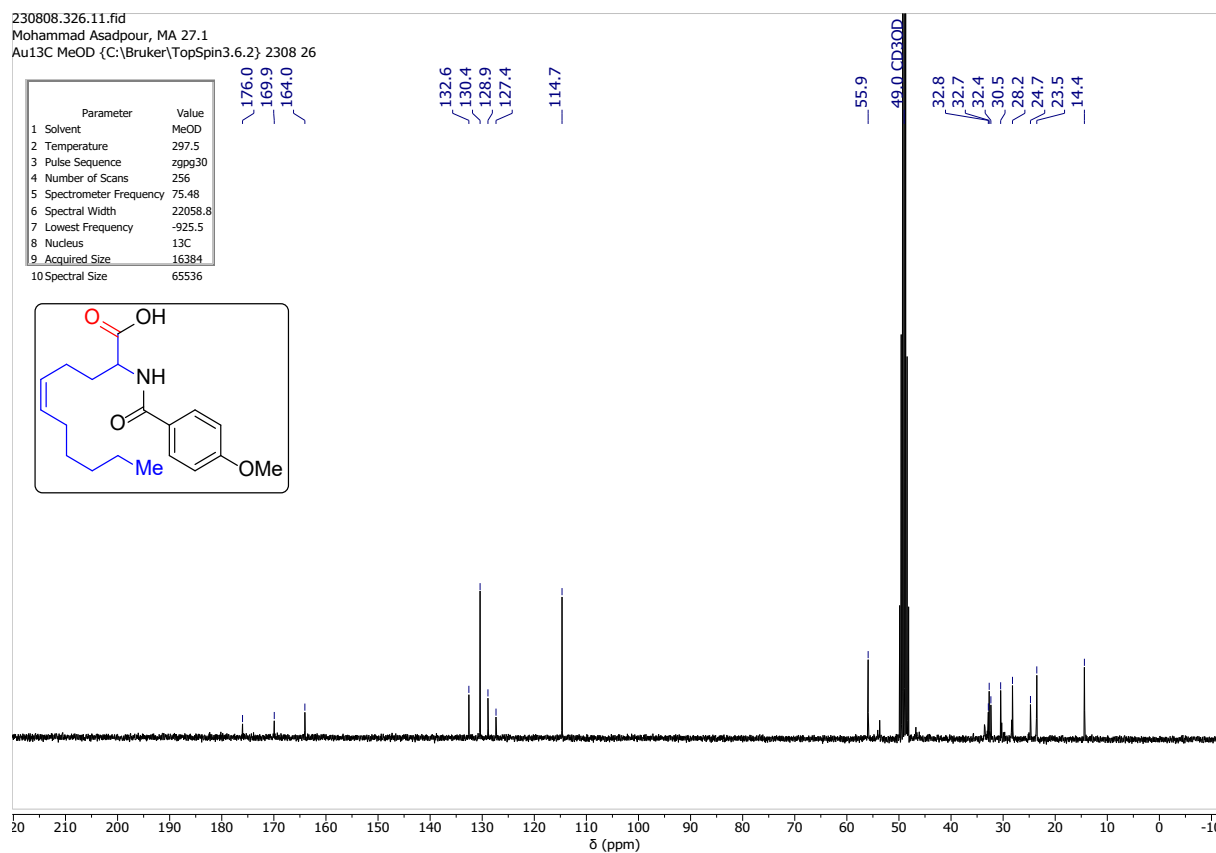

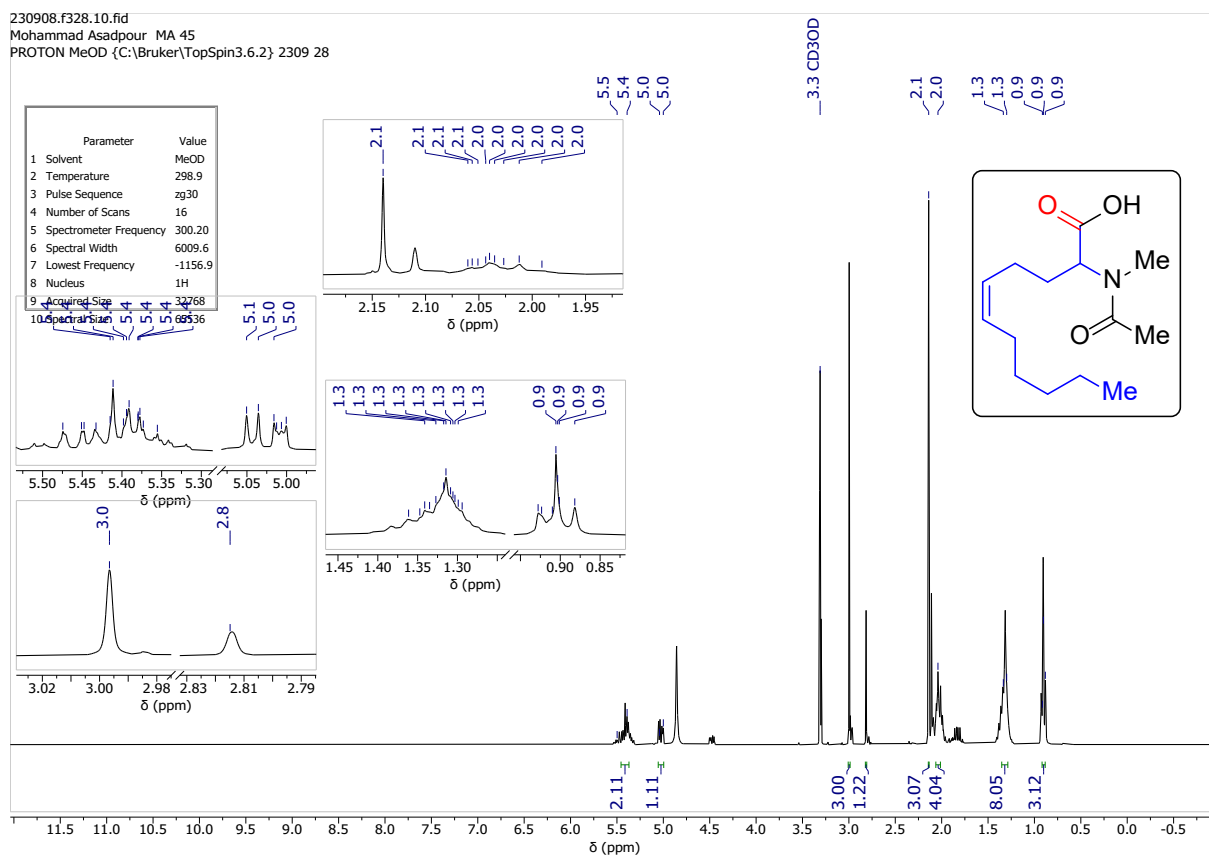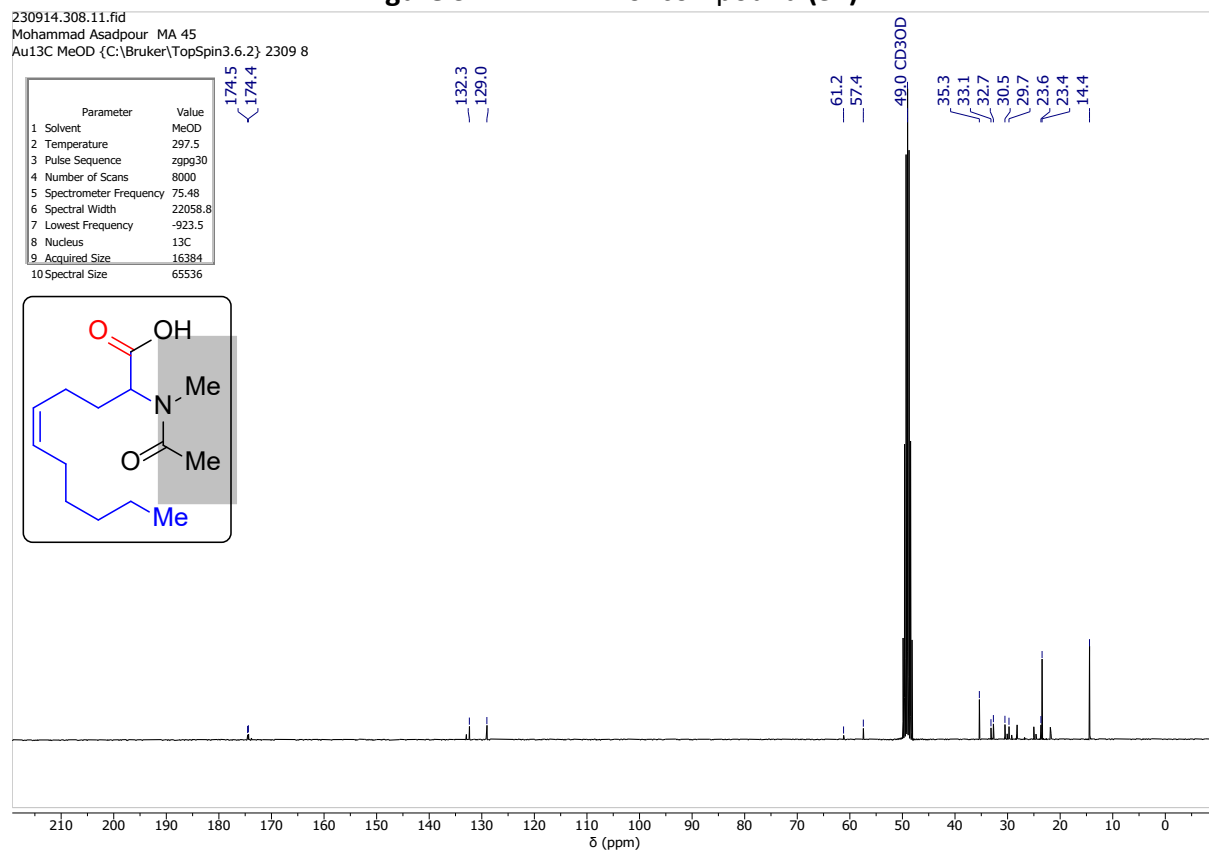

Supplement: d4qo01127a1.pdf [file d4qo01127a1.pdf]
